# Supplementary material
Source: PubMed Central journal article supplement (PMC2652364)
Supplement: blood-2008-05-154302_1.pdf [file blood-2008-05-154302_1.pdf]

| SNP        | Chromosome | pQTL p-value | pQTL q-value | SNP host gene        | eQTL p-value | eQTL TARGET GENE | Target gene chromosome | Target gene ID | Transcript | Expression-AUC p-value |
|------------|------------|--------------|--------------|----------------------|--------------|------------------|------------------------|----------------|------------|------------------------|
| rs17763463 | 2          | 5.00E-05     | 0.37         | <i>FLJ21945</i>      | 1.00E-07     | <i>GIT1</i>      | 17                     | 28964          | 3751541    | 6.60E-05               |
| rs7600852  | 2          | 5.00E-05     | 0.37         | <i>LOC388931</i>     | 1.00E-07     | <i>GIT1</i>      | 17                     | 28964          | 3751541    | 6.60E-05               |
| rs17808412 | 3          | 1.00E-05     | 0.37         |                      | 1.00E-06     | <i>GIT1</i>      | 17                     | 28964          | 3751541    | 6.60E-05               |
| rs13358399 | 5          | 1.00E-04     | 0.37         |                      | 4.00E-06     | <i>C3orf6</i>    |                        | 152137         | 2657981    | 7.69E-05               |
| rs2775139  | 13         | 8.00E-06     | 0.37         |                      | 1.00E-06     | <i>SLC25A37</i>  | 8                      | 51312          | 3090053    | 6.92E-04               |
| rs2775134  | 13         | 2.00E-05     | 0.37         |                      | 2.00E-06     | <i>SLC25A37</i>  | 8                      | 51312          | 3090053    | 6.92E-04               |
| rs1332944  | 13         | 2.00E-05     | 0.37         |                      | 2.00E-06     | <i>SLC25A37</i>  | 8                      | 51312          | 3090053    | 6.92E-04               |
| rs2585498  | 13         | 2.00E-05     | 0.37         |                      | 2.00E-06     | <i>SLC25A37</i>  | 8                      | 51312          | 3090053    | 6.92E-04               |
| rs2585499  | 13         | 1.00E-05     | 0.37         |                      | 3.00E-06     | <i>SLC25A37</i>  | 8                      | 51312          | 3090053    | 6.92E-04               |
| rs17795186 | 11         | 1.00E-04     | 0.37         | <i>DKFZP586H2123</i> | 2.00E-06     | <i>P2RX1</i>     | 17                     | 5023           | 3741769    | 3.99E-03               |
| rs17763463 | 2          | 5.00E-05     | 0.37         | <i>FLJ21945</i>      | 1.00E-06     | <i>PTPRS</i>     | 19                     | 5802           | 3847112    | 1.02E-02               |
| rs7600852  | 2          | 5.00E-05     | 0.37         | <i>LOC388931</i>     | 1.00E-06     | <i>PTPRS</i>     | 19                     | 5802           | 3847112    | 1.02E-02               |
| rs368182   | 16         | 1.00E-04     | 0.37         |                      | 3.00E-06     | <i>CCDC24</i>    | 1                      | 149473         | 2333707    | 4.26E-02               |
| rs6088899  | 20         | 1.00E-04     | 0.37         | <i>SPAG4</i>         | 4.00E-06     | <i>ONECUT2</i>   | 18                     | 9480           | 3789727    | 6.01E-02               |
| rs1496728  | 3          | 1.00E-04     | 0.37         |                      | 1.00E-06     | <i>RAB20</i>     | 13                     | 55647          | 3525498    | 1.01E-01               |
| rs1016831  | 3          | 1.00E-04     | 0.37         |                      | 2.00E-06     | <i>RAB20</i>     | 13                     | 55647          | 3525498    | 1.01E-01               |
| rs12490526 | 3          | 1.00E-04     | 0.37         |                      | 2.00E-06     | <i>RAB20</i>     | 13                     | 55647          | 3525498    | 1.01E-01               |
| rs9759259  | 3          | 1.00E-04     | 0.37         |                      | 2.00E-06     | <i>RAB20</i>     | 13                     | 55647          | 3525498    | 1.01E-01               |
| rs9824287  | 3          | 1.00E-04     | 0.37         |                      | 2.00E-06     | <i>RAB20</i>     | 13                     | 55647          | 3525498    | 1.01E-01               |
| rs16852157 | 3          | 1.00E-04     | 0.37         |                      | 2.00E-06     | <i>RAB20</i>     | 13                     | 55647          | 3525498    | 1.01E-01               |
| rs16852192 | 3          | 8.00E-05     | 0.37         |                      | 3.00E-06     | <i>RAB20</i>     | 13                     | 55647          | 3525498    | 1.01E-01               |
| rs466686   | 5          | 7.00E-05     | 0.37         |                      | 2.00E-06     | <i>AQP10</i>     | 1                      | 89872          | 2360186    | 1.52E-01               |
| rs13165899 | 5          | 1.00E-04     | 0.37         |                      | 2.00E-07     | <i>THY1</i>      | 11                     | 7070           | 3394412    | 3.15E-01               |
| rs12513492 | 5          | 1.00E-04     | 0.37         |                      | 2.00E-07     | <i>THY1</i>      | 11                     | 7070           | 3394412    | 3.15E-01               |
| rs10519906 | 5          | 1.00E-04     | 0.37         |                      | 2.00E-07     | <i>THY1</i>      | 11                     | 7070           | 3394412    | 3.15E-01               |
| rs12517052 | 5          | 1.00E-04     | 0.37         |                      | 2.00E-07     | <i>THY1</i>      | 11                     | 7070           | 3394412    | 3.15E-01               |
| rs1404567  | 1          | 1.00E-04     | 0.37         | <i>CD3Z</i>          | 1.00E-08     | <i>IL12B</i>     | 5                      | 3593           | 2884301    | 4.43E-01               |
| rs12933905 | 16         | 1.00E-04     | 0.37         |                      | 2.00E-06     | <i>SLC1A7</i>    | 1                      | 6512           | 2413115    | 5.22E-01               |
| rs17743910 | 10         | 9.00E-05     | 0.37         | <i>ADAM12</i>        | NS           |                  |                        |                |            |                        |
| rs12248384 | 10         | 9.00E-05     | 0.37         | <i>ADAM12</i>        | NS           |                  |                        |                |            |                        |
| rs818725   | 5          | 3.00E-05     | 0.37         | <i>ADAMTS12</i>      | NS           |                  |                        |                |            |                        |
| rs429419   | 5          | 4.00E-05     | 0.37         | <i>ADAMTS12</i>      | NS           |                  |                        |                |            |                        |
| rs418591   | 5          | 4.00E-05     | 0.37         | <i>ADAMTS12</i>      | NS           |                  |                        |                |            |                        |
| rs7486424  | 12         | 9.00E-05     | 0.37         | <i>ASB8</i>          | NS           |                  |                        |                |            |                        |
| rs4951613  | 1          | 1.00E-04     | 0.37         | <i>ATF3</i>          | NS           |                  |                        |                |            |                        |
| rs2189963  | 7          | 1.00E-04     | 0.37         | <i>AUTS2</i>         | NS           |                  |                        |                |            |                        |

| SNP        | Chromosome | pQTL p-value | pQTL q-value | SNP host gene        | eQTL p-value | eQTL TARGET GENE | Target gene chromosome | Target gene ID | Transcript | Expression-AUC p-value |
|------------|------------|--------------|--------------|----------------------|--------------|------------------|------------------------|----------------|------------|------------------------|
| rs4492249  | 7          | 1.00E-04     | 0.37         | <i>AUTS2</i>         | NS           |                  |                        |                |            |                        |
| rs2658818  | 11         | 4.00E-05     | 0.37         | <i>C11orf39</i>      | NS           |                  |                        |                |            |                        |
| rs2658819  | 11         | 4.00E-05     | 0.37         | <i>C11orf39</i>      | NS           |                  |                        |                |            |                        |
| rs2658857  | 11         | 4.00E-05     | 0.37         | <i>C11orf39</i>      | NS           |                  |                        |                |            |                        |
| rs2658861  | 11         | 4.00E-05     | 0.37         | <i>C11orf39</i>      | NS           |                  |                        |                |            |                        |
| rs2658859  | 11         | 5.00E-05     | 0.37         | <i>C11orf39</i>      | NS           |                  |                        |                |            |                        |
| rs2739288  | 11         | 9.00E-05     | 0.37         | <i>C11orf39</i>      | NS           |                  |                        |                |            |                        |
| rs7354853  | 1          | 7.00E-05     | 0.37         | <i>C1orf184</i>      | NS           |                  |                        |                |            |                        |
| rs7354854  | 1          | 7.00E-05     | 0.37         | <i>C1orf184</i>      | NS           |                  |                        |                |            |                        |
| rs10494482 | 1          | 7.00E-05     | 0.37         | <i>C1orf184</i>      | NS           |                  |                        |                |            |                        |
| rs16863058 | 1          | 7.00E-05     | 0.37         | <i>C1orf184</i>      | NS           |                  |                        |                |            |                        |
| rs12075997 | 1          | 9.00E-05     | 0.37         | <i>C1orf184</i>      | NS           |                  |                        |                |            |                        |
| rs4721775  | 7          | 7.00E-05     | 0.37         | <i>C7orf27</i>       | NS           |                  |                        |                |            |                        |
| rs11859453 | 16         | 1.00E-05     | 0.37         | <i>CDH13</i>         | NS           |                  |                        |                |            |                        |
| rs12923174 | 16         | 5.00E-05     | 0.37         | <i>CDH13</i>         | NS           |                  |                        |                |            |                        |
| rs4550432  | 16         | 9.00E-05     | 0.37         | <i>CDH13</i>         | NS           |                  |                        |                |            |                        |
| rs2786151  | 1          | 1.00E-04     | 0.37         | <i>CHIA</i>          | NS           |                  |                        |                |            |                        |
| rs4693597  | 4          | 1.00E-04     | 0.37         | <i>COQ2</i>          | NS           |                  |                        |                |            |                        |
| rs6535451  | 4          | 1.00E-04     | 0.37         | <i>COQ2</i>          | NS           |                  |                        |                |            |                        |
| rs7667017  | 4          | 1.00E-04     | 0.37         | <i>COQ2</i>          | NS           |                  |                        |                |            |                        |
| rs2274398  | 14         | 1.00E-04     | 0.37         | <i>CTAGE5</i>        | NS           |                  |                        |                |            |                        |
| rs12354787 | 10         | 1.00E-04     | 0.37         | <i>CUBN</i>          | NS           |                  |                        |                |            |                        |
| rs11207100 | 1          | 9.00E-05     | 0.37         | <i>DAB1</i>          | NS           |                  |                        |                |            |                        |
| rs1324628  | 9          | 1.00E-04     | 0.37         | <i>DBC1</i>          | NS           |                  |                        |                |            |                        |
| rs1408519  | 9          | 1.00E-04     | 0.37         | <i>DBC1</i>          | NS           |                  |                        |                |            |                        |
| rs7006802  | 8          | 7.00E-05     | 0.37         | <i>DDEF1</i>         | NS           |                  |                        |                |            |                        |
| rs16927628 | 11         | 2.00E-05     | 0.37         | <i>DKFZP586H2123</i> | NS           |                  |                        |                |            |                        |
| rs3134587  | 15         | 1.00E-04     | 0.37         | <i>DMN</i>           | NS           |                  |                        |                |            |                        |
| rs11618814 | 13         | 1.00E-04     | 0.37         | <i>EDNRB</i>         | NS           |                  |                        |                |            |                        |
| rs3027110  | 13         | 1.00E-04     | 0.37         | <i>EDNRB</i>         | NS           |                  |                        |                |            |                        |
| rs6691602  | 1          | 1.00E-04     | 0.37         | <i>ELTD1</i>         | NS           |                  |                        |                |            |                        |
| rs3770285  | 2          | 2.00E-05     | 0.37         | <i>FLJ10379</i>      | NS           |                  |                        |                |            |                        |
| rs17322370 | 2          | 3.00E-05     | 0.37         | <i>FLJ10379</i>      | NS           |                  |                        |                |            |                        |
| rs1014454  | 2          | 4.00E-05     | 0.37         | <i>FLJ10379</i>      | NS           |                  |                        |                |            |                        |
| rs2117853  | 2          | 5.00E-05     | 0.37         | <i>FLJ10379</i>      | NS           |                  |                        |                |            |                        |
| rs3770277  | 2          | 7.00E-05     | 0.37         | <i>FLJ10379</i>      | NS           |                  |                        |                |            |                        |

| SNP        | Chromosome | pQTL p-value | pQTL q-value | SNP host gene   | eQTL p-value | eQTL TARGET GENE | Target gene chromosome | Target gene ID | Transcript | Expression-AUC p-value |
|------------|------------|--------------|--------------|-----------------|--------------|------------------|------------------------|----------------|------------|------------------------|
| rs9967899  | 2          | 7.00E-05     | 0.37         | <i>FLJ10379</i> | NS           |                  |                        |                |            |                        |
| rs6708810  | 2          | 8.00E-05     | 0.37         | <i>FLJ10379</i> | NS           |                  |                        |                |            |                        |
| rs7592031  | 2          | 8.00E-05     | 0.37         | <i>FLJ10379</i> | NS           |                  |                        |                |            |                        |
| rs17322785 | 2          | 8.00E-05     | 0.37         | <i>FLJ10379</i> | NS           |                  |                        |                |            |                        |
| rs755653   | 2          | 8.00E-05     | 0.37         | <i>FLJ10379</i> | NS           |                  |                        |                |            |                        |
| rs10427374 | 2          | 8.00E-05     | 0.37         | <i>FLJ10379</i> | NS           |                  |                        |                |            |                        |
| rs4425122  | 2          | 8.00E-05     | 0.37         | <i>FLJ10379</i> | NS           |                  |                        |                |            |                        |
| rs6710581  | 2          | 8.00E-05     | 0.37         | <i>FLJ10379</i> | NS           |                  |                        |                |            |                        |
| rs17322603 | 2          | 8.00E-05     | 0.37         | <i>FLJ10379</i> | NS           |                  |                        |                |            |                        |
| rs17394520 | 2          | 8.00E-05     | 0.37         | <i>FLJ10379</i> | NS           |                  |                        |                |            |                        |
| rs17322715 | 2          | 8.00E-05     | 0.37         | <i>FLJ10379</i> | NS           |                  |                        |                |            |                        |
| rs3816107  | 2          | 1.00E-04     | 0.37         | <i>FLJ10379</i> | NS           |                  |                        |                |            |                        |
| rs17322412 | 2          | 1.00E-04     | 0.37         | <i>FLJ10379</i> | NS           |                  |                        |                |            |                        |
| rs3770268  | 2          | 1.00E-04     | 0.37         | <i>FLJ10379</i> | NS           |                  |                        |                |            |                        |
| rs10439468 | 2          | 1.00E-04     | 0.37         | <i>FLJ10379</i> | NS           |                  |                        |                |            |                        |
| rs6719388  | 2          | 1.00E-04     | 0.37         | <i>FLJ10379</i> | NS           |                  |                        |                |            |                        |
| rs2082876  | 2          | 1.00E-04     | 0.37         | <i>FLJ10379</i> | NS           |                  |                        |                |            |                        |
| rs6734588  | 2          | 1.00E-04     | 0.37         | <i>FLJ10379</i> | NS           |                  |                        |                |            |                        |
| rs17394541 | 2          | 1.00E-04     | 0.37         | <i>FLJ10379</i> | NS           |                  |                        |                |            |                        |
| rs7558185  | 2          | 1.00E-04     | 0.37         | <i>FLJ10379</i> | NS           |                  |                        |                |            |                        |
| rs17394527 | 2          | 1.00E-04     | 0.37         | <i>FLJ10379</i> | NS           |                  |                        |                |            |                        |
| rs7558188  | 2          | 1.00E-04     | 0.37         | <i>FLJ10379</i> | NS           |                  |                        |                |            |                        |
| rs10490345 | 2          | 1.00E-04     | 0.37         | <i>FLJ10379</i> | NS           |                  |                        |                |            |                        |
| rs3770292  | 2          | 1.00E-04     | 0.37         | <i>FLJ10379</i> | NS           |                  |                        |                |            |                        |
| rs2082877  | 2          | 1.00E-04     | 0.37         | <i>FLJ10379</i> | NS           |                  |                        |                |            |                        |
| rs10207298 | 2          | 1.00E-04     | 0.37         | <i>FLJ10379</i> | NS           |                  |                        |                |            |                        |
| rs4525744  | 2          | 1.00E-04     | 0.37         | <i>FLJ10379</i> | NS           |                  |                        |                |            |                        |
| rs11896947 | 2          | 1.00E-04     | 0.37         | <i>FLJ10379</i> | NS           |                  |                        |                |            |                        |
| rs3770295  | 2          | 1.00E-04     | 0.37         | <i>FLJ10379</i> | NS           |                  |                        |                |            |                        |
| rs3821063  | 2          | 1.00E-04     | 0.37         | <i>FLJ10379</i> | NS           |                  |                        |                |            |                        |
| rs1840328  | 2          | 8.00E-05     | 0.37         | <i>FLJ39822</i> | NS           |                  |                        |                |            |                        |
| rs6661575  | 1          | 8.00E-05     | 0.37         | <i>FMOD</i>     | NS           |                  |                        |                |            |                        |
| rs2300627  | 6          | 6.00E-05     | 0.37         | <i>GRM1</i>     | NS           |                  |                        |                |            |                        |
| rs9322058  | 6          | 9.00E-05     | 0.37         | <i>GRM1</i>     | NS           |                  |                        |                |            |                        |
| rs362851   | 6          | 1.00E-04     | 0.37         | <i>GRM1</i>     | NS           |                  |                        |                |            |                        |
| rs1400165  | 3          | 9.00E-05     | 0.37         | <i>GRM7</i>     | NS           |                  |                        |                |            |                        |

| SNP        | Chromosome | pQTL p-value | pQTL q-value | SNP host gene    | eQTL p-value | eQTL TARGET GENE | Target gene chromosome | Target gene ID | Transcript | Expression-AUC p-value |
|------------|------------|--------------|--------------|------------------|--------------|------------------|------------------------|----------------|------------|------------------------|
| rs9873905  | 3          | 9.00E-05     | 0.37         | <i>GRM7</i>      | NS           |                  |                        |                |            |                        |
| rs4852062  | 2          | 1.00E-04     | 0.37         | <i>HDAC4</i>     | NS           |                  |                        |                |            |                        |
| rs11910768 | 21         | 1.00E-04     | 0.37         | <i>HLCS</i>      | NS           |                  |                        |                |            |                        |
| rs4693602  | 4          | 6.00E-05     | 0.37         | <i>HPSE</i>      | NS           |                  |                        |                |            |                        |
| rs6853611  | 4          | 6.00E-05     | 0.37         | <i>HTN1</i>      | NS           |                  |                        |                |            |                        |
| rs13148839 | 4          | 6.00E-05     | 0.37         | <i>HTN1</i>      | NS           |                  |                        |                |            |                        |
| rs2833577  | 21         | 1.00E-04     | 0.37         | <i>HUNK</i>      | NS           |                  |                        |                |            |                        |
| rs11631030 | 15         | 1.00E-04     | 0.37         | <i>ITGA11</i>    | NS           |                  |                        |                |            |                        |
| rs4777036  | 15         | 1.00E-04     | 0.37         | <i>ITGA11</i>    | NS           |                  |                        |                |            |                        |
| rs898590   | 15         | 1.00E-04     | 0.37         | <i>ITGA11</i>    | NS           |                  |                        |                |            |                        |
| rs1122247  | 15         | 1.00E-04     | 0.37         | <i>ITGA11</i>    | NS           |                  |                        |                |            |                        |
| rs3098336  | 2          | 1.00E-04     | 0.37         | <i>ITM2C</i>     | NS           |                  |                        |                |            |                        |
| rs7232654  | 18         | 1.00E-04     | 0.37         | <i>KIAA0427</i>  | NS           |                  |                        |                |            |                        |
| rs10920369 | 1          | 3.00E-05     | 0.37         | <i>LGR6</i>      | NS           |                  |                        |                |            |                        |
| rs896549   | 1          | 5.00E-05     | 0.37         | <i>LGR6</i>      | NS           |                  |                        |                |            |                        |
| rs10942747 | 5          | 8.00E-05     | 0.37         | <i>LOC134357</i> | NS           |                  |                        |                |            |                        |
| rs673714   | 18         | 1.00E-04     | 0.37         | <i>LOC388458</i> | NS           |                  |                        |                |            |                        |
| rs13435174 | 4          | 3.00E-05     | 0.37         | <i>LOC442117</i> | NS           |                  |                        |                |            |                        |
| rs338021   | 4          | 3.00E-05     | 0.37         | <i>LOC442117</i> | NS           |                  |                        |                |            |                        |
| rs2877713  | 4          | 6.00E-05     | 0.37         | <i>LOC442117</i> | NS           |                  |                        |                |            |                        |
| rs11766323 | 7          | 9.00E-05     | 0.37         | <i>LOC442511</i> | NS           |                  |                        |                |            |                        |
| rs17827209 | 12         | 1.00E-04     | 0.37         | <i>LOC645738</i> | NS           |                  |                        |                |            |                        |
| rs11031671 | 11         | 6.00E-05     | 0.37         | <i>LOC646008</i> | NS           |                  |                        |                |            |                        |
| rs10809709 | 9          | 4.00E-05     | 0.37         | <i>LOC646138</i> | NS           |                  |                        |                |            |                        |
| rs10971334 | 9          | 1.00E-04     | 0.37         | <i>LOC646808</i> | NS           |                  |                        |                |            |                        |
| rs11709676 | 3          | 1.00E-04     | 0.37         | <i>LOC646951</i> | NS           |                  |                        |                |            |                        |
| rs755822   | 3          | 3.00E-05     | 0.37         | <i>LPP</i>       | NS           |                  |                        |                |            |                        |
| rs4591495  | 3          | 4.00E-05     | 0.37         | <i>LPP</i>       | NS           |                  |                        |                |            |                        |
| rs6793410  | 3          | 4.00E-05     | 0.37         | <i>LPP</i>       | NS           |                  |                        |                |            |                        |
| rs11710884 | 3          | 1.00E-04     | 0.37         | <i>LPP</i>       | NS           |                  |                        |                |            |                        |
| rs13065981 | 3          | 1.00E-04     | 0.37         | <i>LPP</i>       | NS           |                  |                        |                |            |                        |
| rs2138234  | 3          | 1.00E-04     | 0.37         | <i>LPP</i>       | NS           |                  |                        |                |            |                        |
| rs17606853 | 3          | 1.00E-04     | 0.37         | <i>LPP</i>       | NS           |                  |                        |                |            |                        |
| rs4686977  | 3          | 1.00E-04     | 0.37         | <i>LPP</i>       | NS           |                  |                        |                |            |                        |
| rs12786849 | 11         | 1.00E-04     | 0.37         | <i>MAML2</i>     | NS           |                  |                        |                |            |                        |
| rs2035058  | 4          | 6.00E-05     | 0.37         | <i>MAPK10</i>    | NS           |                  |                        |                |            |                        |

| SNP        | Chromosome | pQTL p-value | pQTL q-value | SNP host gene   | eQTL p-value | eQTL TARGET GENE | Target gene chromosome | Target gene ID | Transcript | Expression-AUC p-value |
|------------|------------|--------------|--------------|-----------------|--------------|------------------|------------------------|----------------|------------|------------------------|
| rs10767843 | 11         | 7.00E-05     | 0.37         | <i>MPPED2</i>   | NS           |                  |                        |                |            |                        |
| rs10742241 | 11         | 1.00E-04     | 0.37         | <i>MPPED2</i>   | NS           |                  |                        |                |            |                        |
| rs3811188  | 14         | 1.00E-04     | 0.37         | <i>MRPL52</i>   | NS           |                  |                        |                |            |                        |
| rs1557370  | 21         | 8.00E-05     | 0.37         | <i>MX1</i>      | NS           |                  |                        |                |            |                        |
| rs4971685  | 2          | 6.00E-05     | 0.37         | <i>NRXN1</i>    | NS           |                  |                        |                |            |                        |
| rs988179   | 2          | 1.00E-04     | 0.37         | <i>NRXN1</i>    | NS           |                  |                        |                |            |                        |
| rs972112   | 2          | 1.00E-04     | 0.37         | <i>NRXN1</i>    | NS           |                  |                        |                |            |                        |
| rs12801757 | 11         | 5.00E-05     | 0.37         | <i>OR51N1P</i>  | NS           |                  |                        |                |            |                        |
| rs11168421 | 12         | 6.00E-05     | 0.37         | <i>PFKM</i>     | NS           |                  |                        |                |            |                        |
| rs2269933  | 12         | 9.00E-05     | 0.37         | <i>PFKM</i>     | NS           |                  |                        |                |            |                        |
| rs8025474  | 15         | 1.00E-05     | 0.37         | <i>PIAS1</i>    | NS           |                  |                        |                |            |                        |
| rs10162905 | 15         | 7.00E-05     | 0.37         | <i>PIAS1</i>    | NS           |                  |                        |                |            |                        |
| rs1272623  | 1          | 1.00E-04     | 0.37         | <i>PLXNA2</i>   | NS           |                  |                        |                |            |                        |
| rs5744903  | 12         | 1.00E-04     | 0.37         | <i>POLE</i>     | NS           |                  |                        |                |            |                        |
| rs1016071  | 20         | 1.00E-04     | 0.37         | <i>PTPRT</i>    | NS           |                  |                        |                |            |                        |
| rs10200618 | 2          | 8.00E-06     | 0.37         | <i>PXDN</i>     | NS           |                  |                        |                |            |                        |
| rs9917191  | 2          | 1.00E-05     | 0.37         | <i>PXDN</i>     | NS           |                  |                        |                |            |                        |
| rs6714537  | 2          | 4.00E-05     | 0.37         | <i>PXDN</i>     | NS           |                  |                        |                |            |                        |
| rs9654424  | 5          | 1.00E-04     | 0.37         | <i>RGNEF</i>    | NS           |                  |                        |                |            |                        |
| rs6087733  | 20         | 8.00E-05     | 0.37         | <i>RNPC2</i>    | NS           |                  |                        |                |            |                        |
| rs4770402  | 13         | 1.00E-04     | 0.37         | <i>SGCG</i>     | NS           |                  |                        |                |            |                        |
| rs2664089  | 3          | 3.00E-05     | 0.37         | <i>SRGAP3</i>   | NS           |                  |                        |                |            |                        |
| rs4637803  | 8          | 1.00E-04     | 0.37         | <i>ST3GAL1</i>  | NS           |                  |                        |                |            |                        |
| rs11210928 | 1          | 7.00E-05     | 0.37         | <i>ST3GAL3</i>  | NS           |                  |                        |                |            |                        |
| rs3024921  | 2          | 1.00E-04     | 0.37         | <i>STAT4</i>    | NS           |                  |                        |                |            |                        |
| rs920529   | 8          | 2.00E-05     | 0.37         | <i>SULF1</i>    | NS           |                  |                        |                |            |                        |
| rs6472465  | 8          | 6.00E-05     | 0.37         | <i>SULF1</i>    | NS           |                  |                        |                |            |                        |
| rs3910441  | 12         | 7.00E-05     | 0.37         | <i>TMTC1</i>    | NS           |                  |                        |                |            |                        |
| rs9320367  | 6          | 3.00E-05     | 0.37         | <i>TRAF3IP2</i> | NS           |                  |                        |                |            |                        |
| rs12478869 | 2          | 3.00E-05     | 0.37         | <i>VSNL1</i>    | NS           |                  |                        |                |            |                        |
| rs3924959  | 16         | 1.00E-04     | 0.37         | <i>WWOX</i>     | NS           |                  |                        |                |            |                        |
| rs1293435  | 20         | 2.00E-05     | 0.37         | <i>ZNF218</i>   | NS           |                  |                        |                |            |                        |
| rs16997439 | 20         | 3.00E-05     | 0.37         | <i>ZNF218</i>   | NS           |                  |                        |                |            |                        |
| rs2904294  | 20         | 3.00E-05     | 0.37         | <i>ZNF218</i>   | NS           |                  |                        |                |            |                        |
| rs1293434  | 20         | 4.00E-05     | 0.37         | <i>ZNF218</i>   | NS           |                  |                        |                |            |                        |
| rs6126730  | 20         | 4.00E-05     | 0.37         | <i>ZNF218</i>   | NS           |                  |                        |                |            |                        |

| SNP        | Chromosome | pQTL p-value | pQTL q-value | SNP host gene | eQTL p-value | eQTL TARGET GENE | Target gene chromosome | Target gene ID | Transcript | Expression-AUC p-value |
|------------|------------|--------------|--------------|---------------|--------------|------------------|------------------------|----------------|------------|------------------------|
| rs1293438  | 20         | 6.00E-05     | 0.37         | ZNF218        | NS           |                  |                        |                |            |                        |
| rs6996954  | 8          | 7.00E-05     | 0.37         | ZNF704        | NS           |                  |                        |                |            |                        |
| rs7113550  | 11         | 3.00E-06     | 0.37         |               | NS           |                  |                        |                |            |                        |
| rs7396950  | 11         | 3.00E-06     | 0.37         |               | NS           |                  |                        |                |            |                        |
| rs7122905  | 11         | 3.00E-06     | 0.37         |               | NS           |                  |                        |                |            |                        |
| rs7130932  | 11         | 3.00E-06     | 0.37         |               | NS           |                  |                        |                |            |                        |
| rs4506680  | 11         | 3.00E-06     | 0.37         |               | NS           |                  |                        |                |            |                        |
| rs7130691  | 11         | 4.00E-06     | 0.37         |               | NS           |                  |                        |                |            |                        |
| rs5999854  | 22         | 4.00E-06     | 0.37         |               | NS           |                  |                        |                |            |                        |
| rs9812654  | 3          | 4.00E-06     | 0.37         |               | NS           |                  |                        |                |            |                        |
| rs13324308 | 3          | 4.00E-06     | 0.37         |               | NS           |                  |                        |                |            |                        |
| rs17082808 | 5          | 5.00E-06     | 0.37         |               | NS           |                  |                        |                |            |                        |
| rs17082792 | 5          | 5.00E-06     | 0.37         |               | NS           |                  |                        |                |            |                        |
| rs12187522 | 5          | 5.00E-06     | 0.37         |               | NS           |                  |                        |                |            |                        |
| rs17082845 | 5          | 5.00E-06     | 0.37         |               | NS           |                  |                        |                |            |                        |
| rs6898327  | 5          | 6.00E-06     | 0.37         |               | NS           |                  |                        |                |            |                        |
| rs7109934  | 11         | 6.00E-06     | 0.37         |               | NS           |                  |                        |                |            |                        |
| rs842003   | 5          | 7.00E-06     | 0.37         |               | NS           |                  |                        |                |            |                        |
| rs402589   | 5          | 8.00E-06     | 0.37         |               | NS           |                  |                        |                |            |                        |
| rs10875725 | 12         | 8.00E-06     | 0.37         |               | NS           |                  |                        |                |            |                        |
| rs4821661  | 22         | 9.00E-06     | 0.37         |               | NS           |                  |                        |                |            |                        |
| rs5999832  | 22         | 9.00E-06     | 0.37         |               | NS           |                  |                        |                |            |                        |
| rs367073   | 5          | 9.00E-06     | 0.37         |               | NS           |                  |                        |                |            |                        |
| rs4787783  | 16         | 1.00E-05     | 0.37         |               | NS           |                  |                        |                |            |                        |
| rs197864   | 5          | 1.00E-05     | 0.37         |               | NS           |                  |                        |                |            |                        |
| rs1686410  | 5          | 1.00E-05     | 0.37         |               | NS           |                  |                        |                |            |                        |
| rs1686409  | 5          | 1.00E-05     | 0.37         |               | NS           |                  |                        |                |            |                        |
| rs7070718  | 10         | 1.00E-05     | 0.37         |               | NS           |                  |                        |                |            |                        |
| rs10124396 | 9          | 1.00E-05     | 0.37         |               | NS           |                  |                        |                |            |                        |
| rs4767941  | 12         | 1.00E-05     | 0.37         |               | NS           |                  |                        |                |            |                        |
| rs430952   | 5          | 2.00E-05     | 0.37         |               | NS           |                  |                        |                |            |                        |
| rs447179   | 5          | 2.00E-05     | 0.37         |               | NS           |                  |                        |                |            |                        |
| rs437696   | 5          | 2.00E-05     | 0.37         |               | NS           |                  |                        |                |            |                        |
| rs397317   | 5          | 2.00E-05     | 0.37         |               | NS           |                  |                        |                |            |                        |
| rs369354   | 5          | 2.00E-05     | 0.37         |               | NS           |                  |                        |                |            |                        |
| rs10124341 | 9          | 2.00E-05     | 0.37         |               | NS           |                  |                        |                |            |                        |

| SNP        | Chromosome | pQTL p-value | pQTL q-value | SNP host gene | eQTL p-value | eQTL TARGET GENE | Target gene chromosome | Target gene ID | Transcript | Expression-AUC p-value |
|------------|------------|--------------|--------------|---------------|--------------|------------------|------------------------|----------------|------------|------------------------|
| rs374657   | 5          | 2.00E-05     | 0.37         |               | NS           |                  |                        |                |            |                        |
| rs367474   | 5          | 2.00E-05     | 0.37         |               | NS           |                  |                        |                |            |                        |
| rs373736   | 5          | 2.00E-05     | 0.37         |               | NS           |                  |                        |                |            |                        |
| rs10802761 | 1          | 2.00E-05     | 0.37         |               | NS           |                  |                        |                |            |                        |
| rs405510   | 5          | 2.00E-05     | 0.37         |               | NS           |                  |                        |                |            |                        |
| rs429251   | 5          | 2.00E-05     | 0.37         |               | NS           |                  |                        |                |            |                        |
| rs425868   | 5          | 2.00E-05     | 0.37         |               | NS           |                  |                        |                |            |                        |
| rs372531   | 5          | 2.00E-05     | 0.37         |               | NS           |                  |                        |                |            |                        |
| rs4866867  | 5          | 2.00E-05     | 0.37         |               | NS           |                  |                        |                |            |                        |
| rs392457   | 5          | 2.00E-05     | 0.37         |               | NS           |                  |                        |                |            |                        |
| rs388811   | 5          | 2.00E-05     | 0.37         |               | NS           |                  |                        |                |            |                        |
| rs384890   | 5          | 2.00E-05     | 0.37         |               | NS           |                  |                        |                |            |                        |
| rs17073714 | 13         | 2.00E-05     | 0.37         |               | NS           |                  |                        |                |            |                        |
| rs11489152 | 5          | 2.00E-05     | 0.37         |               | NS           |                  |                        |                |            |                        |
| rs7333521  | 13         | 2.00E-05     | 0.37         |               | NS           |                  |                        |                |            |                        |
| rs397925   | 5          | 2.00E-05     | 0.37         |               | NS           |                  |                        |                |            |                        |
| rs9601533  | 13         | 2.00E-05     | 0.37         |               | NS           |                  |                        |                |            |                        |
| rs371616   | 5          | 2.00E-05     | 0.37         |               | NS           |                  |                        |                |            |                        |
| rs292773   | 11         | 2.00E-05     | 0.37         |               | NS           |                  |                        |                |            |                        |
| rs2246417  | 21         | 2.00E-05     | 0.37         |               | NS           |                  |                        |                |            |                        |
| rs4246959  | 11         | 2.00E-05     | 0.37         |               | NS           |                  |                        |                |            |                        |
| rs2150444  | 21         | 2.00E-05     | 0.37         |               | NS           |                  |                        |                |            |                        |
| rs1888534  | 21         | 2.00E-05     | 0.37         |               | NS           |                  |                        |                |            |                        |
| rs9855555  | 3          | 2.00E-05     | 0.37         |               | NS           |                  |                        |                |            |                        |
| rs909704   | 22         | 2.00E-05     | 0.37         |               | NS           |                  |                        |                |            |                        |
| rs9318726  | 13         | 2.00E-05     | 0.37         |               | NS           |                  |                        |                |            |                        |
| rs9601532  | 13         | 2.00E-05     | 0.37         |               | NS           |                  |                        |                |            |                        |
| rs10161976 | 13         | 2.00E-05     | 0.37         |               | NS           |                  |                        |                |            |                        |
| rs12764523 | 10         | 2.00E-05     | 0.37         |               | NS           |                  |                        |                |            |                        |
| rs2739277  | 11         | 2.00E-05     | 0.37         |               | NS           |                  |                        |                |            |                        |
| rs16838572 | 1          | 3.00E-05     | 0.37         |               | NS           |                  |                        |                |            |                        |
| rs7516979  | 1          | 3.00E-05     | 0.37         |               | NS           |                  |                        |                |            |                        |
| rs4980550  | 11         | 3.00E-05     | 0.37         |               | NS           |                  |                        |                |            |                        |
| rs812348   | 4          | 3.00E-05     | 0.37         |               | NS           |                  |                        |                |            |                        |
| rs1522990  | 2          | 3.00E-05     | 0.37         |               | NS           |                  |                        |                |            |                        |
| rs6078859  | 20         | 3.00E-05     | 0.37         |               | NS           |                  |                        |                |            |                        |

| SNP        | Chromosome | pQTL p-value | pQTL q-value | SNP host gene | eQTL p-value | eQTL TARGET GENE | Target gene chromosome | Target gene ID | Transcript | Expression-AUC p-value |
|------------|------------|--------------|--------------|---------------|--------------|------------------|------------------------|----------------|------------|------------------------|
| rs7894113  | 10         | 3.00E-05     | 0.37         |               | NS           |                  |                        |                |            |                        |
| rs12778784 | 10         | 3.00E-05     | 0.37         |               | NS           |                  |                        |                |            |                        |
| rs7909485  | 10         | 3.00E-05     | 0.37         |               | NS           |                  |                        |                |            |                        |
| rs7100774  | 10         | 3.00E-05     | 0.37         |               | NS           |                  |                        |                |            |                        |
| rs7916507  | 10         | 3.00E-05     | 0.37         |               | NS           |                  |                        |                |            |                        |
| rs16910797 | 10         | 3.00E-05     | 0.37         |               | NS           |                  |                        |                |            |                        |
| rs16910842 | 10         | 3.00E-05     | 0.37         |               | NS           |                  |                        |                |            |                        |
| rs1356119  | 4          | 3.00E-05     | 0.37         |               | NS           |                  |                        |                |            |                        |
| rs16910845 | 10         | 3.00E-05     | 0.37         |               | NS           |                  |                        |                |            |                        |
| rs711969   | 3          | 3.00E-05     | 0.37         |               | NS           |                  |                        |                |            |                        |
| rs12777353 | 10         | 3.00E-05     | 0.37         |               | NS           |                  |                        |                |            |                        |
| rs2025501  | 9          | 3.00E-05     | 0.37         |               | NS           |                  |                        |                |            |                        |
| rs12776778 | 10         | 3.00E-05     | 0.37         |               | NS           |                  |                        |                |            |                        |
| rs7322410  | 13         | 3.00E-05     | 0.37         |               | NS           |                  |                        |                |            |                        |
| rs10920316 | 1          | 3.00E-05     | 0.37         |               | NS           |                  |                        |                |            |                        |
| rs16910862 | 10         | 3.00E-05     | 0.37         |               | NS           |                  |                        |                |            |                        |
| rs10756334 | 9          | 3.00E-05     | 0.37         |               | NS           |                  |                        |                |            |                        |
| rs2393260  | 10         | 3.00E-05     | 0.37         |               | NS           |                  |                        |                |            |                        |
| rs7088834  | 10         | 3.00E-05     | 0.37         |               | NS           |                  |                        |                |            |                        |
| rs16910848 | 10         | 3.00E-05     | 0.37         |               | NS           |                  |                        |                |            |                        |
| rs11741889 | 5          | 3.00E-05     | 0.37         |               | NS           |                  |                        |                |            |                        |
| rs267033   | 5          | 3.00E-05     | 0.37         |               | NS           |                  |                        |                |            |                        |
| rs267035   | 5          | 3.00E-05     | 0.37         |               | NS           |                  |                        |                |            |                        |
| rs371223   | 5          | 3.00E-05     | 0.37         |               | NS           |                  |                        |                |            |                        |
| rs374104   | 5          | 3.00E-05     | 0.37         |               | NS           |                  |                        |                |            |                        |
| rs387029   | 5          | 3.00E-05     | 0.37         |               | NS           |                  |                        |                |            |                        |
| rs10809710 | 9          | 3.00E-05     | 0.37         |               | NS           |                  |                        |                |            |                        |
| rs2202780  | 13         | 3.00E-05     | 0.37         |               | NS           |                  |                        |                |            |                        |
| rs434097   | 5          | 3.00E-05     | 0.37         |               | NS           |                  |                        |                |            |                        |
| rs1686416  | 5          | 3.00E-05     | 0.37         |               | NS           |                  |                        |                |            |                        |
| rs10768329 | 11         | 4.00E-05     | 0.37         |               | NS           |                  |                        |                |            |                        |
| rs1420167  | 7          | 4.00E-05     | 0.37         |               | NS           |                  |                        |                |            |                        |
| rs292769   | 11         | 4.00E-05     | 0.37         |               | NS           |                  |                        |                |            |                        |
| rs292774   | 11         | 4.00E-05     | 0.37         |               | NS           |                  |                        |                |            |                        |
| rs292732   | 11         | 4.00E-05     | 0.37         |               | NS           |                  |                        |                |            |                        |
| rs1515042  | 11         | 4.00E-05     | 0.37         |               | NS           |                  |                        |                |            |                        |



| SNP        | Chromosome | pQTL p-value | pQTL q-value | SNP host gene | eQTL p-value | eQTL TARGET GENE | Target gene chromosome | Target gene ID | Transcript | Expression-AUC p-value |
|------------|------------|--------------|--------------|---------------|--------------|------------------|------------------------|----------------|------------|------------------------|
| rs715853   | 11         | 4.00E-05     | 0.37         |               | NS           |                  |                        |                |            |                        |
| rs16930685 | 11         | 4.00E-05     | 0.37         |               | NS           |                  |                        |                |            |                        |
| rs16930679 | 11         | 4.00E-05     | 0.37         |               | NS           |                  |                        |                |            |                        |
| rs12276421 | 11         | 4.00E-05     | 0.37         |               | NS           |                  |                        |                |            |                        |
| rs1588836  | 11         | 4.00E-05     | 0.37         |               | NS           |                  |                        |                |            |                        |
| rs8055387  | 16         | 4.00E-05     | 0.37         |               | NS           |                  |                        |                |            |                        |
| rs11168493 | 12         | 4.00E-05     | 0.37         |               | NS           |                  |                        |                |            |                        |
| rs1086215  | 11         | 4.00E-05     | 0.37         |               | NS           |                  |                        |                |            |                        |
| rs1086216  | 11         | 4.00E-05     | 0.37         |               | NS           |                  |                        |                |            |                        |
| rs6564296  | 16         | 4.00E-05     | 0.37         |               | NS           |                  |                        |                |            |                        |
| rs7801544  | 7          | 4.00E-05     | 0.37         |               | NS           |                  |                        |                |            |                        |
| rs7779114  | 7          | 4.00E-05     | 0.37         |               | NS           |                  |                        |                |            |                        |
| rs10202833 | 2          | 4.00E-05     | 0.37         |               | NS           |                  |                        |                |            |                        |
| rs2216505  | 2          | 4.00E-05     | 0.37         |               | NS           |                  |                        |                |            |                        |
| rs292757   | 11         | 4.00E-05     | 0.37         |               | NS           |                  |                        |                |            |                        |
| rs1813963  | 11         | 4.00E-05     | 0.37         |               | NS           |                  |                        |                |            |                        |
| rs292754   | 11         | 4.00E-05     | 0.37         |               | NS           |                  |                        |                |            |                        |
| rs8045666  | 16         | 4.00E-05     | 0.37         |               | NS           |                  |                        |                |            |                        |
| rs7699310  | 4          | 4.00E-05     | 0.37         |               | NS           |                  |                        |                |            |                        |
| rs17459914 | 1          | 4.00E-05     | 0.37         |               | NS           |                  |                        |                |            |                        |
| rs17116972 | 1          | 4.00E-05     | 0.37         |               | NS           |                  |                        |                |            |                        |
| rs16910846 | 10         | 4.00E-05     | 0.37         |               | NS           |                  |                        |                |            |                        |
| rs11034433 | 11         | 4.00E-05     | 0.37         |               | NS           |                  |                        |                |            |                        |
| rs11034450 | 11         | 4.00E-05     | 0.37         |               | NS           |                  |                        |                |            |                        |
| rs7909594  | 10         | 4.00E-05     | 0.37         |               | NS           |                  |                        |                |            |                        |
| rs10076472 | 5          | 4.00E-05     | 0.37         |               | NS           |                  |                        |                |            |                        |
| rs367980   | 5          | 5.00E-05     | 0.37         |               | NS           |                  |                        |                |            |                        |
| rs434363   | 5          | 5.00E-05     | 0.37         |               | NS           |                  |                        |                |            |                        |
| rs13356374 | 5          | 5.00E-05     | 0.37         |               | NS           |                  |                        |                |            |                        |
| rs17403069 | 5          | 5.00E-05     | 0.37         |               | NS           |                  |                        |                |            |                        |
| rs265910   | 5          | 5.00E-05     | 0.37         |               | NS           |                  |                        |                |            |                        |
| rs12129897 | 1          | 5.00E-05     | 0.37         |               | NS           |                  |                        |                |            |                        |
| rs197443   | 5          | 5.00E-05     | 0.37         |               | NS           |                  |                        |                |            |                        |
| rs159125   | 20         | 5.00E-05     | 0.37         |               | NS           |                  |                        |                |            |                        |
| rs13332693 | 16         | 5.00E-05     | 0.37         |               | NS           |                  |                        |                |            |                        |
| rs13334859 | 16         | 5.00E-05     | 0.37         |               | NS           |                  |                        |                |            |                        |

| SNP        | Chromosome | pQTL p-value | pQTL q-value | SNP host gene | eQTL p-value | eQTL TARGET GENE | Target gene chromosome | Target gene ID | Transcript | Expression-AUC p-value |
|------------|------------|--------------|--------------|---------------|--------------|------------------|------------------------|----------------|------------|------------------------|
| rs12102700 | 16         | 5.00E-05     | 0.37         |               | NS           |                  |                        |                |            |                        |
| rs956882   | 5          | 5.00E-05     | 0.37         |               | NS           |                  |                        |                |            |                        |
| rs10124330 | 9          | 5.00E-05     | 0.37         |               | NS           |                  |                        |                |            |                        |
| rs7135989  | 12         | 5.00E-05     | 0.37         |               | NS           |                  |                        |                |            |                        |
| rs16943646 | 16         | 5.00E-05     | 0.37         |               | NS           |                  |                        |                |            |                        |
| rs8048241  | 16         | 5.00E-05     | 0.37         |               | NS           |                  |                        |                |            |                        |
| rs1566184  | 16         | 5.00E-05     | 0.37         |               | NS           |                  |                        |                |            |                        |
| rs12538699 | 7          | 5.00E-05     | 0.37         |               | NS           |                  |                        |                |            |                        |
| rs292733   | 11         | 5.00E-05     | 0.37         |               | NS           |                  |                        |                |            |                        |
| rs1012107  | 7          | 5.00E-05     | 0.37         |               | NS           |                  |                        |                |            |                        |
| rs1420172  | 7          | 5.00E-05     | 0.37         |               | NS           |                  |                        |                |            |                        |
| rs359436   | 5          | 5.00E-05     | 0.37         |               | NS           |                  |                        |                |            |                        |
| rs167125   | 11         | 5.00E-05     | 0.37         |               | NS           |                  |                        |                |            |                        |
| rs888019   | 7          | 5.00E-05     | 0.37         |               | NS           |                  |                        |                |            |                        |
| rs1420169  | 7          | 5.00E-05     | 0.37         |               | NS           |                  |                        |                |            |                        |
| rs3850729  | 5          | 5.00E-05     | 0.37         |               | NS           |                  |                        |                |            |                        |
| rs6465578  | 7          | 5.00E-05     | 0.37         |               | NS           |                  |                        |                |            |                        |
| rs842002   | 5          | 5.00E-05     | 0.37         |               | NS           |                  |                        |                |            |                        |
| rs7796739  | 7          | 5.00E-05     | 0.37         |               | NS           |                  |                        |                |            |                        |
| rs9691916  | 7          | 5.00E-05     | 0.37         |               | NS           |                  |                        |                |            |                        |
| rs7780092  | 7          | 5.00E-05     | 0.37         |               | NS           |                  |                        |                |            |                        |
| rs4516662  | 4          | 5.00E-05     | 0.37         |               | NS           |                  |                        |                |            |                        |
| rs9541996  | 13         | 6.00E-05     | 0.37         |               | NS           |                  |                        |                |            |                        |
| rs9541975  | 13         | 6.00E-05     | 0.37         |               | NS           |                  |                        |                |            |                        |
| rs1605645  | 13         | 6.00E-05     | 0.37         |               | NS           |                  |                        |                |            |                        |
| rs1396309  | 13         | 6.00E-05     | 0.37         |               | NS           |                  |                        |                |            |                        |
| rs9541997  | 13         | 6.00E-05     | 0.37         |               | NS           |                  |                        |                |            |                        |
| rs2841416  | 1          | 6.00E-05     | 0.37         |               | NS           |                  |                        |                |            |                        |
| rs2689128  | 1          | 6.00E-05     | 0.37         |               | NS           |                  |                        |                |            |                        |
| rs1086214  | 11         | 6.00E-05     | 0.37         |               | NS           |                  |                        |                |            |                        |
| rs7333541  | 13         | 6.00E-05     | 0.37         |               | NS           |                  |                        |                |            |                        |
| rs7716944  | 5          | 6.00E-05     | 0.37         |               | NS           |                  |                        |                |            |                        |
| rs9924764  | 16         | 6.00E-05     | 0.37         |               | NS           |                  |                        |                |            |                        |
| rs12875137 | 13         | 6.00E-05     | 0.37         |               | NS           |                  |                        |                |            |                        |
| rs9924244  | 16         | 6.00E-05     | 0.37         |               | NS           |                  |                        |                |            |                        |
| rs9283762  | 5          | 6.00E-05     | 0.37         |               | NS           |                  |                        |                |            |                        |

| SNP        | Chromosome | pQTL p-value | pQTL q-value | SNP host gene | eQTL p-value | eQTL TARGET GENE | Target gene chromosome | Target gene ID | Transcript | Expression-AUC p-value |
|------------|------------|--------------|--------------|---------------|--------------|------------------|------------------------|----------------|------------|------------------------|
| rs9927640  | 16         | 6.00E-05     | 0.37         |               | NS           |                  |                        |                |            |                        |
| rs9929501  | 16         | 6.00E-05     | 0.37         |               | NS           |                  |                        |                |            |                        |
| rs7194994  | 16         | 6.00E-05     | 0.37         |               | NS           |                  |                        |                |            |                        |
| rs16943701 | 16         | 6.00E-05     | 0.37         |               | NS           |                  |                        |                |            |                        |
| rs878037   | 5          | 6.00E-05     | 0.37         |               | NS           |                  |                        |                |            |                        |
| rs16873876 | 5          | 6.00E-05     | 0.37         |               | NS           |                  |                        |                |            |                        |
| rs16873829 | 5          | 6.00E-05     | 0.37         |               | NS           |                  |                        |                |            |                        |
| rs382137   | 5          | 6.00E-05     | 0.37         |               | NS           |                  |                        |                |            |                        |
| rs4866773  | 5          | 6.00E-05     | 0.37         |               | NS           |                  |                        |                |            |                        |
| rs10017897 | 4          | 6.00E-05     | 0.37         |               | NS           |                  |                        |                |            |                        |
| rs4866772  | 5          | 6.00E-05     | 0.37         |               | NS           |                  |                        |                |            |                        |
| rs10067818 | 5          | 6.00E-05     | 0.37         |               | NS           |                  |                        |                |            |                        |
| rs13147389 | 4          | 6.00E-05     | 0.37         |               | NS           |                  |                        |                |            |                        |
| rs7349699  | 4          | 6.00E-05     | 0.37         |               | NS           |                  |                        |                |            |                        |
| rs2138269  | 4          | 6.00E-05     | 0.37         |               | NS           |                  |                        |                |            |                        |
| rs13144465 | 4          | 6.00E-05     | 0.37         |               | NS           |                  |                        |                |            |                        |
| rs10068893 | 5          | 7.00E-05     | 0.37         |               | NS           |                  |                        |                |            |                        |
| rs12646149 | 4          | 7.00E-05     | 0.37         |               | NS           |                  |                        |                |            |                        |
| rs1995395  | 3          | 7.00E-05     | 0.37         |               | NS           |                  |                        |                |            |                        |
| rs7610382  | 3          | 7.00E-05     | 0.37         |               | NS           |                  |                        |                |            |                        |
| rs7224322  | 17         | 7.00E-05     | 0.37         |               | NS           |                  |                        |                |            |                        |
| rs6795429  | 3          | 7.00E-05     | 0.37         |               | NS           |                  |                        |                |            |                        |
| rs17393522 | 2          | 7.00E-05     | 0.37         |               | NS           |                  |                        |                |            |                        |
| rs2039536  | 1          | 7.00E-05     | 0.37         |               | NS           |                  |                        |                |            |                        |
| rs12089836 | 1          | 7.00E-05     | 0.37         |               | NS           |                  |                        |                |            |                        |
| rs1405401  | 3          | 7.00E-05     | 0.37         |               | NS           |                  |                        |                |            |                        |
| rs10079877 | 5          | 7.00E-05     | 0.37         |               | NS           |                  |                        |                |            |                        |
| rs1010663  | 9          | 7.00E-05     | 0.37         |               | NS           |                  |                        |                |            |                        |
| rs7801935  | 7          | 7.00E-05     | 0.37         |               | NS           |                  |                        |                |            |                        |
| rs1498060  | 16         | 7.00E-05     | 0.37         |               | NS           |                  |                        |                |            |                        |
| rs11739800 | 5          | 7.00E-05     | 0.37         |               | NS           |                  |                        |                |            |                        |
| rs9541976  | 13         | 7.00E-05     | 0.37         |               | NS           |                  |                        |                |            |                        |
| rs619126   | 9          | 7.00E-05     | 0.37         |               | NS           |                  |                        |                |            |                        |
| rs11617150 | 13         | 7.00E-05     | 0.37         |               | NS           |                  |                        |                |            |                        |
| rs12147701 | 14         | 7.00E-05     | 0.37         |               | NS           |                  |                        |                |            |                        |
| rs10148661 | 14         | 7.00E-05     | 0.37         |               | NS           |                  |                        |                |            |                        |

| SNP        | Chromosome | pQTL p-value | pQTL q-value | SNP host gene | eQTL p-value | eQTL TARGET GENE | Target gene chromosome | Target gene ID | Transcript | Expression-AUC p-value |
|------------|------------|--------------|--------------|---------------|--------------|------------------|------------------------|----------------|------------|------------------------|
| rs2898392  | 8          | 8.00E-05     | 0.37         |               | NS           |                  |                        |                |            |                        |
| rs7455701  | 7          | 8.00E-05     | 0.37         |               | NS           |                  |                        |                |            |                        |
| rs2172159  | 4          | 8.00E-05     | 0.37         |               | NS           |                  |                        |                |            |                        |
| rs4866887  | 5          | 8.00E-05     | 0.37         |               | NS           |                  |                        |                |            |                        |
| rs4866885  | 5          | 8.00E-05     | 0.37         |               | NS           |                  |                        |                |            |                        |
| rs2560533  | 5          | 8.00E-05     | 0.37         |               | NS           |                  |                        |                |            |                        |
| rs13070827 | 3          | 8.00E-05     | 0.37         |               | NS           |                  |                        |                |            |                        |
| rs7975956  | 12         | 8.00E-05     | 0.37         |               | NS           |                  |                        |                |            |                        |
| rs6492852  | 15         | 8.00E-05     | 0.37         |               | NS           |                  |                        |                |            |                        |
| rs11619231 | 13         | 8.00E-05     | 0.37         |               | NS           |                  |                        |                |            |                        |
| rs711963   | 3          | 8.00E-05     | 0.37         |               | NS           |                  |                        |                |            |                        |
| rs1837893  | 3          | 9.00E-05     | 0.37         |               | NS           |                  |                        |                |            |                        |
| rs11060852 | 12         | 9.00E-05     | 0.37         |               | NS           |                  |                        |                |            |                        |
| rs6470016  | 8          | 9.00E-05     | 0.37         |               | NS           |                  |                        |                |            |                        |
| rs1446262  | 9          | 9.00E-05     | 0.37         |               | NS           |                  |                        |                |            |                        |
| rs2838875  | 21         | 9.00E-05     | 0.37         |               | NS           |                  |                        |                |            |                        |
| rs1144374  | 13         | 9.00E-05     | 0.37         |               | NS           |                  |                        |                |            |                        |
| rs16824236 | 2          | 9.00E-05     | 0.37         |               | NS           |                  |                        |                |            |                        |
| rs11620299 | 13         | 9.00E-05     | 0.37         |               | NS           |                  |                        |                |            |                        |
| rs16943685 | 16         | 9.00E-05     | 0.37         |               | NS           |                  |                        |                |            |                        |
| rs7796251  | 7          | 9.00E-05     | 0.37         |               | NS           |                  |                        |                |            |                        |
| rs1393320  | 3          | 9.00E-05     | 0.37         |               | NS           |                  |                        |                |            |                        |
| rs10935170 | 3          | 9.00E-05     | 0.37         |               | NS           |                  |                        |                |            |                        |
| rs153669   | 16         | 9.00E-05     | 0.37         |               | NS           |                  |                        |                |            |                        |
| rs17717641 | 9          | 9.00E-05     | 0.37         |               | NS           |                  |                        |                |            |                        |
| rs17636522 | 4          | 9.00E-05     | 0.37         |               | NS           |                  |                        |                |            |                        |
| rs389750   | 16         | 1.00E-04     | 0.37         |               | NS           |                  |                        |                |            |                        |
| rs12699514 | 7          | 1.00E-04     | 0.37         |               | NS           |                  |                        |                |            |                        |
| rs10507877 | 13         | 1.00E-04     | 0.37         |               | NS           |                  |                        |                |            |                        |
| rs3944117  | 7          | 1.00E-04     | 0.37         |               | NS           |                  |                        |                |            |                        |
| rs588116   | 16         | 1.00E-04     | 0.37         |               | NS           |                  |                        |                |            |                        |
| rs17068683 | 13         | 1.00E-04     | 0.37         |               | NS           |                  |                        |                |            |                        |
| rs17068806 | 13         | 1.00E-04     | 0.37         |               | NS           |                  |                        |                |            |                        |
| rs10499430 | 7          | 1.00E-04     | 0.37         |               | NS           |                  |                        |                |            |                        |
| rs7317557  | 13         | 1.00E-04     | 0.37         |               | NS           |                  |                        |                |            |                        |
| rs1396308  | 13         | 1.00E-04     | 0.37         |               | NS           |                  |                        |                |            |                        |

| SNP        | Chromosome | pQTL p-value | pQTL q-value | SNP host gene | eQTL p-value | eQTL TARGET GENE | Target gene chromosome | Target gene ID | Transcript | Expression-AUC p-value |
|------------|------------|--------------|--------------|---------------|--------------|------------------|------------------------|----------------|------------|------------------------|
| rs6942929  | 7          | 1.00E-04     | 0.37         |               | NS           |                  |                        |                |            |                        |
| rs2416174  | 14         | 1.00E-04     | 0.37         |               | NS           |                  |                        |                |            |                        |
| rs648929   | 16         | 1.00E-04     | 0.37         |               | NS           |                  |                        |                |            |                        |
| rs9542025  | 13         | 1.00E-04     | 0.37         |               | NS           |                  |                        |                |            |                        |
| rs9325868  | 8          | 1.00E-04     | 0.37         |               | NS           |                  |                        |                |            |                        |
| rs4921714  | 8          | 1.00E-04     | 0.37         |               | NS           |                  |                        |                |            |                        |
| rs30891    | 16         | 1.00E-04     | 0.37         |               | NS           |                  |                        |                |            |                        |
| rs42557    | 16         | 1.00E-04     | 0.37         |               | NS           |                  |                        |                |            |                        |
| rs30894    | 16         | 1.00E-04     | 0.37         |               | NS           |                  |                        |                |            |                        |
| rs1484800  | 8          | 1.00E-04     | 0.37         |               | NS           |                  |                        |                |            |                        |
| rs30882    | 16         | 1.00E-04     | 0.37         |               | NS           |                  |                        |                |            |                        |
| rs7860461  | 9          | 1.00E-04     | 0.37         |               | NS           |                  |                        |                |            |                        |
| rs1330910  | 13         | 1.00E-04     | 0.37         |               | NS           |                  |                        |                |            |                        |
| rs9601525  | 13         | 1.00E-04     | 0.37         |               | NS           |                  |                        |                |            |                        |
| rs9601527  | 13         | 1.00E-04     | 0.37         |               | NS           |                  |                        |                |            |                        |
| rs17068814 | 13         | 1.00E-04     | 0.37         |               | NS           |                  |                        |                |            |                        |
| rs754455   | 8          | 1.00E-04     | 0.37         |               | NS           |                  |                        |                |            |                        |
| rs1038465  | 8          | 1.00E-04     | 0.37         |               | NS           |                  |                        |                |            |                        |
| rs153329   | 16         | 1.00E-04     | 0.37         |               | NS           |                  |                        |                |            |                        |
| rs13278974 | 8          | 1.00E-04     | 0.37         |               | NS           |                  |                        |                |            |                        |
| rs506139   | 16         | 1.00E-04     | 0.37         |               | NS           |                  |                        |                |            |                        |
| rs13276179 | 8          | 1.00E-04     | 0.37         |               | NS           |                  |                        |                |            |                        |
| rs2383651  | 1          | 1.00E-04     | 0.37         |               | NS           |                  |                        |                |            |                        |
| rs2383650  | 1          | 1.00E-04     | 0.37         |               | NS           |                  |                        |                |            |                        |
| rs711967   | 3          | 1.00E-04     | 0.37         |               | NS           |                  |                        |                |            |                        |
| rs1661466  | 3          | 1.00E-04     | 0.37         |               | NS           |                  |                        |                |            |                        |
| rs4389696  | 5          | 1.00E-04     | 0.37         |               | NS           |                  |                        |                |            |                        |
| rs1361049  | 1          | 1.00E-04     | 0.37         |               | NS           |                  |                        |                |            |                        |
| rs824080   | 3          | 1.00E-04     | 0.37         |               | NS           |                  |                        |                |            |                        |
| rs4439408  | 1          | 1.00E-04     | 0.37         |               | NS           |                  |                        |                |            |                        |
| rs6664880  | 1          | 1.00E-04     | 0.37         |               | NS           |                  |                        |                |            |                        |
| rs711970   | 3          | 1.00E-04     | 0.37         |               | NS           |                  |                        |                |            |                        |
| rs3861062  | 11         | 1.00E-04     | 0.37         |               | NS           |                  |                        |                |            |                        |
| rs10804106 | 2          | 1.00E-04     | 0.37         |               | NS           |                  |                        |                |            |                        |
| rs2135537  | 11         | 1.00E-04     | 0.37         |               | NS           |                  |                        |                |            |                        |
| rs1343839  | 3          | 1.00E-04     | 0.37         |               | NS           |                  |                        |                |            |                        |

| SNP        | Chromosome | pQTL p-value | pQTL q-value | SNP host gene | eQTL p-value | eQTL TARGET GENE | Target gene chromosome | Target gene ID | Transcript | Expression-AUC p-value |
|------------|------------|--------------|--------------|---------------|--------------|------------------|------------------------|----------------|------------|------------------------|
| rs7067775  | 10         | 1.00E-04     | 0.37         |               | NS           |                  |                        |                |            |                        |
| rs10749145 | 10         | 1.00E-04     | 0.37         |               | NS           |                  |                        |                |            |                        |
| rs11194324 | 10         | 1.00E-04     | 0.37         |               | NS           |                  |                        |                |            |                        |
| rs7920072  | 10         | 1.00E-04     | 0.37         |               | NS           |                  |                        |                |            |                        |
| rs2393259  | 10         | 1.00E-04     | 0.37         |               | NS           |                  |                        |                |            |                        |
| rs7730111  | 5          | 1.00E-04     | 0.37         |               | NS           |                  |                        |                |            |                        |
| rs12647654 | 4          | 1.00E-04     | 0.37         |               | NS           |                  |                        |                |            |                        |
| rs10518069 | 4          | 1.00E-04     | 0.37         |               | NS           |                  |                        |                |            |                        |
| rs1220826  | 4          | 1.00E-04     | 0.37         |               | NS           |                  |                        |                |            |                        |
| rs1220862  | 4          | 1.00E-04     | 0.37         |               | NS           |                  |                        |                |            |                        |
| rs6855899  | 4          | 1.00E-04     | 0.37         |               | NS           |                  |                        |                |            |                        |
| rs1995394  | 3          | 1.00E-04     | 0.37         |               | NS           |                  |                        |                |            |                        |
| rs2138268  | 4          | 1.00E-04     | 0.37         |               | NS           |                  |                        |                |            |                        |
| rs7920622  | 10         | 1.00E-04     | 0.37         |               | NS           |                  |                        |                |            |                        |
| rs9992192  | 4          | 1.00E-04     | 0.37         |               | NS           |                  |                        |                |            |                        |
| rs12487825 | 3          | 1.00E-04     | 0.37         |               | NS           |                  |                        |                |            |                        |
| rs10848092 | 12         | 1.00E-04     | 0.37         |               | NS           |                  |                        |                |            |                        |
| rs1567081  | 11         | 1.00E-04     | 0.37         |               | NS           |                  |                        |                |            |                        |
| rs16943648 | 16         | 1.00E-04     | 0.37         |               | NS           |                  |                        |                |            |                        |
| rs10060241 | 5          | 1.00E-04     | 0.37         |               | NS           |                  |                        |                |            |                        |
| rs17346050 | 5          | 1.00E-04     | 0.37         |               | NS           |                  |                        |                |            |                        |
| rs1358224  | 5          | 1.00E-04     | 0.37         |               | NS           |                  |                        |                |            |                        |
| rs1617928  | 10         | 1.00E-04     | 0.37         |               | NS           |                  |                        |                |            |                        |
| rs13333708 | 16         | 1.00E-04     | 0.37         |               | NS           |                  |                        |                |            |                        |
| rs9327047  | 5          | 1.00E-04     | 0.37         |               | NS           |                  |                        |                |            |                        |
| rs2658811  | 11         | 1.00E-04     | 0.37         |               | NS           |                  |                        |                |            |                        |
| rs12896339 | 14         | 1.00E-04     | 0.37         |               | NS           |                  |                        |                |            |                        |
| rs6488801  | 12         | 1.00E-04     | 0.37         |               | NS           |                  |                        |                |            |                        |
| rs11043875 | 12         | 1.00E-04     | 0.37         |               | NS           |                  |                        |                |            |                        |
| rs4760687  | 12         | 1.00E-04     | 0.37         |               | NS           |                  |                        |                |            |                        |
| rs702847   | 5          | 1.00E-04     | 0.37         |               | NS           |                  |                        |                |            |                        |
| rs2635181  | 5          | 1.00E-04     | 0.37         |               | NS           |                  |                        |                |            |                        |
| rs12659711 | 5          | 1.00E-04     | 0.37         |               | NS           |                  |                        |                |            |                        |
| rs17403118 | 5          | 1.00E-04     | 0.37         |               | NS           |                  |                        |                |            |                        |
| rs9327048  | 5          | 1.00E-04     | 0.37         |               | NS           |                  |                        |                |            |                        |
| rs8055547  | 16         | 1.00E-04     | 0.37         |               | NS           |                  |                        |                |            |                        |

| <b>SNP</b> | <b>Chromosome</b> | <b>pQTL<br/>p-value</b> | <b>pQTL<br/>q-<br/>value</b> | <b>SNP host gene</b> | <b>eQTL<br/>p-value</b> | <b>eQTL<br/>TARGET<br/>GENE</b> | <b>Target gene<br/>chromosome</b> | <b>Target<br/>gene ID</b> | <b>Transcript</b> | <b>Expression-<br/>AUC p-value</b> |
|------------|-------------------|-------------------------|------------------------------|----------------------|-------------------------|---------------------------------|-----------------------------------|---------------------------|-------------------|------------------------------------|
| rs192378   | 5                 | 1.00E-04                | 0.37                         |                      | NS                      |                                 |                                   |                           |                   |                                    |
| rs10054930 | 5                 | 1.00E-04                | 0.37                         |                      | NS                      |                                 |                                   |                           |                   |                                    |
| rs267071   | 5                 | 1.00E-04                | 0.37                         |                      | NS                      |                                 |                                   |                           |                   |                                    |
