# Supplementary material
Source: PubMed Central journal article supplement (PMC2652364)
Supplement: blood-2008-05-154302_2.pdf [file blood-2008-05-154302_2.pdf]

| SNP        | Chromosome | pQTL p-value | pQTL q-value | SNP host gene           | eQTL p-value | eQTL TARGET GENE | Target gene chromosome | Target gene ID | Transcript | Expression-AUC p-value |
|------------|------------|--------------|--------------|-------------------------|--------------|------------------|------------------------|----------------|------------|------------------------|
| rs938562   | 4          | 1.00E-04     | 0.56         | <i>SLC2A9</i>           | 3.00E-06     | <i>RPS6KA2</i>   | 6                      | 6196           | 2984655    | 1.59E-05               |
| rs16836403 | 1          | 1.00E-04     | 0.56         |                         | 1.00E-06     | <i>BMP3</i>      | 4                      | 651            | 2733483    | 5.24E-04               |
| rs16836417 | 1          | 1.00E-04     | 0.56         |                         | 1.00E-06     | <i>BMP3</i>      | 4                      | 651            | 2733483    | 5.24E-04               |
| rs11799391 | 1          | 1.00E-04     | 0.56         |                         | 1.00E-06     | <i>BMP3</i>      | 4                      | 651            | 2733483    | 5.24E-04               |
| rs16836421 | 1          | 1.00E-04     | 0.56         |                         | 1.00E-06     | <i>BMP3</i>      | 4                      | 651            | 2733483    | 5.24E-04               |
| rs4742299  | 9          | 9.00E-05     | 0.56         | <i>JMJD2C</i>           | 2.00E-07     | <i>MIST</i>      | 19                     | 116449         | 3852783    | 7.45E-04               |
| rs4742299  | 9          | 9.00E-05     | 0.56         | <i>JMJD2C</i>           | 2.00E-07     | <i>DNAJB1</i>    | 19                     | 3337           | 3852783    | 7.45E-04               |
| rs4742299  | 9          | 9.00E-05     | 0.56         | <i>JMJD2C</i>           | 2.00E-07     | <i>MIST</i>      | 19                     | 116449         | 3852783    | 7.45E-04               |
| rs4742299  | 9          | 9.00E-05     | 0.56         | <i>JMJD2C</i>           | 2.00E-07     | <i>DNAJB1</i>    | 19                     | 3337           | 3852783    | 7.45E-04               |
| rs11677428 | 2          | 1.00E-05     | 0.56         | <i>CCDC85A</i>          | 8.00E-07     | <i>SDC3</i>      | 1                      | 9672           | 2404209    | 1.23E-03               |
| rs11677428 | 2          | 1.00E-05     | 0.56         | <i>CCDC85A</i>          | 8.00E-07     | <i>LOC731990</i> | 1                      | 731990         | 2404209    | 1.23E-03               |
| rs10973320 | 9          | 2.00E-05     | 0.56         |                         | 4.00E-08     | <i>RAD51AP1</i>  | 12                     | 10635          | 3401804    | 2.95E-03               |
| rs10906723 | 10         | 1.00E-04     | 0.56         | <i>FAM107B</i>          | 2.00E-06     | <i>LOC399491</i> | 17                     | 399491         | 3751625    | 5.49E-03               |
| rs10906723 | 10         | 1.00E-04     | 0.56         | <i>FAM107B</i>          | 2.00E-06     | <i>SSH2</i>      | 17                     | 85464          | 3751625    | 5.49E-03               |
| rs12225692 | 11         | 9.00E-05     | 0.56         | <i>ANKRD42</i>          | 2.00E-06     | <i>NAB2</i>      | 12                     | 4665           | 3417809    | 7.43E-03               |
| rs16919696 | 8          | 5.00E-05     | 0.56         |                         | 6.00E-07     | <i>CLDN16</i>    | 3                      | 10686          | 2657808    | 8.46E-03               |
| rs2430853  | 18         | 1.00E-05     | 0.56         | <i>LOC645158,SMCHD1</i> | 4.00E-07     | <i>ANPEP</i>     | 15                     | 290            | 3638607    | 1.70E-02               |
| rs4634268  | 4          | 1.00E-04     | 0.56         |                         | 1.00E-06     | <i>ANPEP</i>     | 15                     | 290            | 3638607    | 1.70E-02               |
| rs10906723 | 10         | 1.00E-04     | 0.56         | <i>FAM107B</i>          | 2.00E-06     | <i>FAM78A</i>    | 9                      | 286336         | 3227574    | 1.74E-02               |
| rs10461692 | 5          | 8.00E-05     | 0.56         |                         | 1.00E-06     | <i>FAM129A</i>   | 1                      | 116496         | 2447877    | 1.89E-02               |
| rs11957363 | 5          | 1.00E-04     | 0.56         |                         | 7.00E-07     | <i>FAM129A</i>   | 1                      | 116496         | 2447877    | 1.89E-02               |
| rs1392421  | 5          | 1.00E-04     | 0.56         |                         | 7.00E-07     | <i>FAM129A</i>   | 1                      | 116496         | 2447877    | 1.89E-02               |
| rs17667845 | 5          | 1.00E-04     | 0.56         |                         | 7.00E-07     | <i>FAM129A</i>   | 1                      | 116496         | 2447877    | 1.89E-02               |
| rs17604706 | 5          | 1.00E-04     | 0.56         |                         | 7.00E-07     | <i>FAM129A</i>   | 1                      | 116496         | 2447877    | 1.89E-02               |
| rs6591904  | 11         | 1.00E-04     | 0.56         |                         | 4.00E-07     | <i>BLVRB</i>     | 19                     | 645            | 3862661    | 2.23E-02               |
| rs6591904  | 11         | 1.00E-04     | 0.56         |                         | 4.00E-07     | <i>BLVRB</i>     | 19                     | 645            | 3862661    | 2.23E-02               |
| rs12712001 | 2          | 1.00E-04     | 0.56         |                         | 3.00E-06     | <i>LOC730467</i> | 10                     | 730467         | 3301713    | 2.34E-02               |
| rs12712001 | 2          | 1.00E-04     | 0.56         |                         | 3.00E-06     | <i>LOC399804</i> | 10                     | 399804         | 3301713    | 2.34E-02               |
| rs12712001 | 2          | 1.00E-04     | 0.56         |                         | 3.00E-06     | <i>ALK</i>       | 10                     | 238            | 3301713    | 2.34E-02               |
| rs12712001 | 2          | 1.00E-04     | 0.56         |                         | 3.00E-06     | <i>LOC729342</i> | 10                     | 729342         | 3301713    | 2.34E-02               |
| rs12712001 | 2          | 1.00E-04     | 0.56         |                         | 3.00E-06     | <i>BLNK</i>      | 10                     | 29760          | 3301713    | 2.34E-02               |
| rs12712001 | 2          | 1.00E-04     | 0.56         |                         | 3.00E-06     | <i>NPM1</i>      | 10                     | 4869           | 3301713    | 2.34E-02               |
| rs1839049  | 3          | 2.00E-05     | 0.56         |                         | 2.00E-06     | <i>TMEM123</i>   | 11                     | 114908         | 3388631    | 2.88E-02               |
| rs9942049  | 3          | 1.00E-04     | 0.56         |                         | 1.00E-06     | <i>SPATA18</i>   | 4                      | 132671         | 2726910    | 3.34E-02               |
| rs9942049  | 3          | 1.00E-04     | 0.56         |                         | 1.00E-06     | <i>SPATA18</i>   | 4                      | 132671         | 2726910    | 3.34E-02               |
| rs9942049  | 3          | 1.00E-04     | 0.56         |                         | 1.00E-06     | <i>SPATA18</i>   | 4                      | 132671         | 2726910    | 3.34E-02               |
| rs9942049  | 3          | 1.00E-04     | 0.56         |                         | 1.00E-06     | <i>SPATA18</i>   | 4                      | 132671         | 2726910    | 3.34E-02               |
| rs10193059 | 2          | 3.00E-05     | 0.56         | <i>LOC150935</i>        | 3.00E-06     | <i>SOD3</i>      | 4                      | 6649           | 2721633    | 4.70E-02               |

| SNP        | Chromosome | pQTL p-value | pQTL q-value | SNP host gene         | eQTL p-value | eQTL TARGET GENE | Target gene chromosome | Target gene ID | Transcript | Expression-AUC p-value |
|------------|------------|--------------|--------------|-----------------------|--------------|------------------|------------------------|----------------|------------|------------------------|
| rs10181725 | 2          | 4.00E-05     | 0.56         | <i>LOC150935</i>      | 2.00E-06     | <i>SOD3</i>      | 4                      | 6649           | 2721633    | 4.70E-02               |
| rs10973320 | 9          | 2.00E-05     | 0.56         |                       | 3.00E-06     | <i>NKTR</i>      | 12                     | 4820           | 3474104    | 6.04E-02               |
| rs10973320 | 9          | 2.00E-05     | 0.56         |                       | 3.00E-06     | <i>CIT</i>       | 12                     | 11113          | 3474104    | 6.04E-02               |
| rs12880549 | 14         | 5.00E-05     | 0.56         |                       | 3.00E-06     | <i>IL1B</i>      | 2                      | 3553           | 2571510    | 7.22E-02               |
| rs12464668 | 2          | 1.00E-04     | 0.56         |                       | 9.00E-07     | <i>KREMEN1</i>   | 22                     | 83999          | 3941793    | 7.67E-02               |
| rs10973320 | 9          | 2.00E-05     | 0.56         |                       | 2.00E-06     | <i>ADNP</i>      | 20                     | 23394          | 3909354    | 9.73E-02               |
| rs12814300 | 12         | 2.00E-05     | 0.56         |                       | 3.00E-06     | <i>PAG1</i>      | 8                      | 55824          | 3142217    | 1.26E-01               |
| rs10935039 | 3          | 6.00E-05     | 0.56         |                       | 2.00E-07     | <i>IGF2BP1</i>   | 17                     | 10642          | 3725517    | 1.84E-01               |
| rs10512881 | 3          | 1.00E-04     | 0.56         |                       | 3.00E-07     | <i>IGF2BP1</i>   | 17                     | 10642          | 3725517    | 1.84E-01               |
| rs10193059 | 2          | 3.00E-05     | 0.56         | <i>LOC150935</i>      | 2.00E-06     | <i>CDK3</i>      | 17                     | 1018           | 3735346    | 2.55E-01               |
| rs10181725 | 2          | 4.00E-05     | 0.56         | <i>LOC150935</i>      | 4.00E-07     | <i>CDK3</i>      | 17                     | 1018           | 3735346    | 2.55E-01               |
| rs10190247 | 2          | 1.00E-04     | 0.56         | <i>LOC150935</i>      | 1.00E-06     | <i>CDK3</i>      | 17                     | 1018           | 3735346    | 2.55E-01               |
| rs10800070 | 1          | 1.00E-04     | 0.56         |                       | 2.00E-06     | <i>PLEKHJ1</i>   | 19                     | 55111          | 3845782    | 2.66E-01               |
| rs10800070 | 1          | 1.00E-04     | 0.56         |                       | 2.00E-06     | <i>PLEKHJ1</i>   | 19                     | 55111          | 3845782    | 2.66E-01               |
| rs1007636  | 6          | 1.00E-04     | 0.56         | <i>HLA-DMB</i>        | 3.00E-06     | <i>LOC644919</i> | 15                     | 644919         | 3642358    | 3.51E-01               |
| rs1007636  | 6          | 1.00E-04     | 0.56         | <i>HLA-DMB</i>        | 3.00E-06     | <i>TM2D3</i>     | 15                     | 80213          | 3642358    | 3.51E-01               |
| rs10756811 | 9          | 1.00E-04     | 0.56         | <i>BNC2</i>           | 8.00E-07     | <i>ATF5</i>      | 19                     | 22809          | 3839103    | 5.18E-01               |
| rs10756811 | 9          | 1.00E-04     | 0.56         | <i>BNC2</i>           | 8.00E-07     | <i>ATF5</i>      | 19                     | 22809          | 3839103    | 5.18E-01               |
| rs12434821 | 14         | 7.00E-07     | 0.50         | <i>NRXN3</i>          | NS           |                  |                        |                |            |                        |
| rs10000191 | 4          | 2.00E-06     | 0.50         |                       | NS           |                  |                        |                |            |                        |
| rs7679656  | 4          | 2.00E-06     | 0.50         |                       | NS           |                  |                        |                |            |                        |
| rs17050955 | 4          | 2.00E-06     | 0.50         |                       | NS           |                  |                        |                |            |                        |
| rs953789   | 4          | 2.00E-06     | 0.50         |                       | NS           |                  |                        |                |            |                        |
| rs7857929  | 9          | 2.00E-06     | 0.50         | <i>BNC2</i>           | NS           |                  |                        |                |            |                        |
| rs10810625 | 9          | 2.00E-06     | 0.50         | <i>BNC2,LOC648570</i> | NS           |                  |                        |                |            |                        |
| rs4924279  | 15         | 2.00E-06     | 0.50         |                       | NS           |                  |                        |                |            |                        |
| rs2246237  | 20         | 2.00E-06     | 0.50         |                       | NS           |                  |                        |                |            |                        |
| rs2840518  | 8          | 3.00E-06     | 0.56         |                       | NS           |                  |                        |                |            |                        |
| rs4592400  | 11         | 3.00E-06     | 0.56         | <i>PARVA</i>          | NS           |                  |                        |                |            |                        |
| rs9543844  | 13         | 3.00E-06     | 0.56         |                       | NS           |                  |                        |                |            |                        |
| rs10962579 | 9          | 4.00E-06     | 0.56         | <i>BNC2</i>           | NS           |                  |                        |                |            |                        |
| rs5014481  | 14         | 4.00E-06     | 0.56         | <i>NRXN3</i>          | NS           |                  |                        |                |            |                        |
| rs7687634  | 4          | 5.00E-06     | 0.56         |                       | NS           |                  |                        |                |            |                        |
| rs933935   | 11         | 5.00E-06     | 0.56         | <i>PARVA</i>          | NS           |                  |                        |                |            |                        |
| rs257143   | 5          | 6.00E-06     | 0.56         |                       | NS           |                  |                        |                |            |                        |
| rs11228202 | 11         | 6.00E-06     | 0.56         | <i>LRP5</i>           | NS           |                  |                        |                |            |                        |
| rs4796217  | 17         | 6.00E-06     | 0.56         |                       | NS           |                  |                        |                |            |                        |
| rs2066586  | 13         | 7.00E-06     | 0.56         |                       | NS           |                  |                        |                |            |                        |

| SNP        | Chromosome | pQTL p-value | pQTL q-value | SNP host gene  | eQTL p-value | eQTL TARGET GENE | Target gene chromosome | Target gene ID | Transcript | Expression-AUC p-value |
|------------|------------|--------------|--------------|----------------|--------------|------------------|------------------------|----------------|------------|------------------------|
| rs17050980 | 4          | 8.00E-06     | 0.56         |                | NS           |                  |                        |                |            |                        |
| rs404727   | 20         | 8.00E-06     | 0.56         |                | NS           |                  |                        |                |            |                        |
| rs7981648  | 13         | 9.00E-06     | 0.56         |                | NS           |                  |                        |                |            |                        |
| rs7340621  | 3          | 1.00E-05     | 0.56         |                | NS           |                  |                        |                |            |                        |
| rs6822870  | 4          | 1.00E-05     | 0.56         |                | NS           |                  |                        |                |            |                        |
| rs10088561 | 8          | 1.00E-05     | 0.56         |                | NS           |                  |                        |                |            |                        |
| rs10122265 | 9          | 1.00E-05     | 0.56         | <i>ZCCHC7</i>  | NS           |                  |                        |                |            |                        |
| rs3802553  | 10         | 1.00E-05     | 0.56         | <i>SORCS1</i>  | NS           |                  |                        |                |            |                        |
| rs4757537  | 11         | 1.00E-05     | 0.56         | <i>PARVA</i>   | NS           |                  |                        |                |            |                        |
| rs12424410 | 12         | 1.00E-05     | 0.56         |                | NS           |                  |                        |                |            |                        |
| rs11183583 | 12         | 1.00E-05     | 0.56         |                | NS           |                  |                        |                |            |                        |
| rs2860869  | 2          | 2.00E-05     | 0.56         |                | NS           |                  |                        |                |            |                        |
| rs7561233  | 2          | 2.00E-05     | 0.56         |                | NS           |                  |                        |                |            |                        |
| rs6747148  | 2          | 2.00E-05     | 0.56         |                | NS           |                  |                        |                |            |                        |
| rs12992947 | 2          | 2.00E-05     | 0.56         |                | NS           |                  |                        |                |            |                        |
| rs6763896  | 3          | 2.00E-05     | 0.56         |                | NS           |                  |                        |                |            |                        |
| rs10013125 | 4          | 2.00E-05     | 0.56         |                | NS           |                  |                        |                |            |                        |
| rs17050979 | 4          | 2.00E-05     | 0.56         |                | NS           |                  |                        |                |            |                        |
| rs12212688 | 6          | 2.00E-05     | 0.56         |                | NS           |                  |                        |                |            |                        |
| rs1849527  | 6          | 2.00E-05     | 0.56         |                | NS           |                  |                        |                |            |                        |
| rs1322142  | 9          | 2.00E-05     | 0.56         |                | NS           |                  |                        |                |            |                        |
| rs10738453 | 9          | 2.00E-05     | 0.56         | <i>BNC2</i>    | NS           |                  |                        |                |            |                        |
| rs7869097  | 9          | 2.00E-05     | 0.56         | <i>BNC2</i>    | NS           |                  |                        |                |            |                        |
| rs1888205  | 9          | 2.00E-05     | 0.56         | <i>BNC2</i>    | NS           |                  |                        |                |            |                        |
| rs1970284  | 9          | 2.00E-05     | 0.56         | <i>BNC2</i>    | NS           |                  |                        |                |            |                        |
| rs1970285  | 9          | 2.00E-05     | 0.56         | <i>BNC2</i>    | NS           |                  |                        |                |            |                        |
| rs4405008  | 9          | 2.00E-05     | 0.56         | <i>BNC2</i>    | NS           |                  |                        |                |            |                        |
| rs7853424  | 9          | 2.00E-05     | 0.56         | <i>BNC2</i>    | NS           |                  |                        |                |            |                        |
| rs4961750  | 9          | 2.00E-05     | 0.56         | <i>BNC2</i>    | NS           |                  |                        |                |            |                        |
| rs10962581 | 9          | 2.00E-05     | 0.56         | <i>BNC2</i>    | NS           |                  |                        |                |            |                        |
| rs7031734  | 9          | 2.00E-05     | 0.56         |                | NS           |                  |                        |                |            |                        |
| rs10760581 | 9          | 2.00E-05     | 0.56         | <i>CCBL1</i>   | NS           |                  |                        |                |            |                        |
| rs10988599 | 9          | 2.00E-05     | 0.56         | <i>GPR107</i>  | NS           |                  |                        |                |            |                        |
| rs2670194  | 10         | 2.00E-05     | 0.56         |                | NS           |                  |                        |                |            |                        |
| rs7925034  | 11         | 2.00E-05     | 0.56         | <i>NARS2</i>   | NS           |                  |                        |                |            |                        |
| rs10792506 | 11         | 2.00E-05     | 0.56         |                | NS           |                  |                        |                |            |                        |
| rs7153476  | 14         | 2.00E-05     | 0.56         | <i>RAD51L1</i> | NS           |                  |                        |                |            |                        |
| rs4784405  | 16         | 2.00E-05     | 0.56         |                | NS           |                  |                        |                |            |                        |

| SNP        | Chromosome | pQTL p-value | pQTL q-value | SNP host gene   | eQTL p-value | eQTL TARGET GENE | Target gene chromosome | Target gene ID | Transcript | Expression-AUC p-value |
|------------|------------|--------------|--------------|-----------------|--------------|------------------|------------------------|----------------|------------|------------------------|
| rs12450722 | 17         | 2.00E-05     | 0.56         | <i>PAFAH1B1</i> | NS           |                  |                        |                |            |                        |
| rs7237237  | 18         | 2.00E-05     | 0.56         |                 | NS           |                  |                        |                |            |                        |
| rs2195741  | 18         | 2.00E-05     | 0.56         |                 | NS           |                  |                        |                |            |                        |
| rs6025231  | 20         | 2.00E-05     | 0.56         |                 | NS           |                  |                        |                |            |                        |
| rs6014865  | 20         | 2.00E-05     | 0.56         |                 | NS           |                  |                        |                |            |                        |
| rs693956   | 1          | 3.00E-05     | 0.56         | <i>SGIP1</i>    | NS           |                  |                        |                |            |                        |
| rs553729   | 1          | 3.00E-05     | 0.56         | <i>SGIP1</i>    | NS           |                  |                        |                |            |                        |
| rs657808   | 1          | 3.00E-05     | 0.56         | <i>SGIP1</i>    | NS           |                  |                        |                |            |                        |
| rs11805492 | 1          | 3.00E-05     | 0.56         | <i>OLFM3</i>    | NS           |                  |                        |                |            |                        |
| rs13425938 | 2          | 3.00E-05     | 0.56         |                 | NS           |                  |                        |                |            |                        |
| rs17045723 | 2          | 3.00E-05     | 0.56         |                 | NS           |                  |                        |                |            |                        |
| rs1910945  | 2          | 3.00E-05     | 0.56         |                 | NS           |                  |                        |                |            |                        |
| rs4849451  | 2          | 3.00E-05     | 0.56         |                 | NS           |                  |                        |                |            |                        |
| rs16828862 | 3          | 3.00E-05     | 0.56         |                 | NS           |                  |                        |                |            |                        |
| rs10804931 | 3          | 3.00E-05     | 0.56         |                 | NS           |                  |                        |                |            |                        |
| rs12508268 | 4          | 3.00E-05     | 0.56         |                 | NS           |                  |                        |                |            |                        |
| rs4863340  | 4          | 3.00E-05     | 0.56         |                 | NS           |                  |                        |                |            |                        |
| rs2431617  | 5          | 3.00E-05     | 0.56         |                 | NS           |                  |                        |                |            |                        |
| rs525413   | 6          | 3.00E-05     | 0.56         |                 | NS           |                  |                        |                |            |                        |
| rs530025   | 6          | 3.00E-05     | 0.56         |                 | NS           |                  |                        |                |            |                        |
| rs1411430  | 9          | 3.00E-05     | 0.56         | <i>BNC2</i>     | NS           |                  |                        |                |            |                        |
| rs2840290  | 9          | 3.00E-05     | 0.56         | <i>BNC2</i>     | NS           |                  |                        |                |            |                        |
| rs2150090  | 9          | 3.00E-05     | 0.56         | <i>BNC2</i>     | NS           |                  |                        |                |            |                        |
| rs4878672  | 9          | 3.00E-05     | 0.56         | <i>PAX5</i>     | NS           |                  |                        |                |            |                        |
| rs7043330  | 9          | 3.00E-05     | 0.56         | <i>ZCCHC7</i>   | NS           |                  |                        |                |            |                        |
| rs13328464 | 9          | 3.00E-05     | 0.56         | <i>ZCCHC7</i>   | NS           |                  |                        |                |            |                        |
| rs10796210 | 10         | 3.00E-05     | 0.56         | <i>FAM107B</i>  | NS           |                  |                        |                |            |                        |
| rs2254415  | 10         | 3.00E-05     | 0.56         | <i>C10orf27</i> | NS           |                  |                        |                |            |                        |
| rs2578118  | 10         | 3.00E-05     | 0.56         |                 | NS           |                  |                        |                |            |                        |
| rs11002738 | 10         | 3.00E-05     | 0.56         |                 | NS           |                  |                        |                |            |                        |
| rs3802727  | 10         | 3.00E-05     | 0.56         |                 | NS           |                  |                        |                |            |                        |
| rs7901090  | 10         | 3.00E-05     | 0.56         | <i>SORCS1</i>   | NS           |                  |                        |                |            |                        |
| rs7928933  | 11         | 3.00E-05     | 0.56         | <i>NARS2</i>    | NS           |                  |                        |                |            |                        |
| rs523225   | 11         | 3.00E-05     | 0.56         |                 | NS           |                  |                        |                |            |                        |
| rs2188399  | 12         | 3.00E-05     | 0.56         |                 | NS           |                  |                        |                |            |                        |
| rs9928294  | 16         | 3.00E-05     | 0.56         |                 | NS           |                  |                        |                |            |                        |
| rs7263112  | 20         | 3.00E-05     | 0.56         | <i>ACSS1</i>    | NS           |                  |                        |                |            |                        |
| rs4810051  | 20         | 3.00E-05     | 0.56         |                 | NS           |                  |                        |                |            |                        |

| SNP        | Chromosome | pQTL p-value | pQTL q-value | SNP host gene   | eQTL p-value | eQTL TARGET GENE | Target gene chromosome | Target gene ID | Transcript | Expression-AUC p-value |
|------------|------------|--------------|--------------|-----------------|--------------|------------------|------------------------|----------------|------------|------------------------|
| rs6718129  | 2          | 4.00E-05     | 0.56         |                 | NS           |                  |                        |                |            |                        |
| rs3771684  | 2          | 4.00E-05     | 0.56         | <i>BAZ2B</i>    | NS           |                  |                        |                |            |                        |
| rs9843547  | 3          | 4.00E-05     | 0.56         |                 | NS           |                  |                        |                |            |                        |
| rs16862586 | 3          | 4.00E-05     | 0.56         |                 | NS           |                  |                        |                |            |                        |
| rs17261025 | 4          | 4.00E-05     | 0.56         |                 | NS           |                  |                        |                |            |                        |
| rs10518568 | 4          | 4.00E-05     | 0.56         |                 | NS           |                  |                        |                |            |                        |
| rs10520971 | 5          | 4.00E-05     | 0.56         |                 | NS           |                  |                        |                |            |                        |
| rs1639416  | 6          | 4.00E-05     | 0.56         |                 | NS           |                  |                        |                |            |                        |
| rs17748267 | 8          | 4.00E-05     | 0.56         | <i>MSRA</i>     | NS           |                  |                        |                |            |                        |
| rs800576   | 8          | 4.00E-05     | 0.56         |                 | NS           |                  |                        |                |            |                        |
| rs1330302  | 9          | 4.00E-05     | 0.56         | <i>BNC2</i>     | NS           |                  |                        |                |            |                        |
| rs1854694  | 9          | 4.00E-05     | 0.56         | <i>BNC2</i>     | NS           |                  |                        |                |            |                        |
| rs3904154  | 9          | 4.00E-05     | 0.56         | <i>BNC2</i>     | NS           |                  |                        |                |            |                        |
| rs3850446  | 9          | 4.00E-05     | 0.56         | <i>BNC2</i>     | NS           |                  |                        |                |            |                        |
| rs3850447  | 9          | 4.00E-05     | 0.56         | <i>BNC2</i>     | NS           |                  |                        |                |            |                        |
| rs1411429  | 9          | 4.00E-05     | 0.56         | <i>BNC2</i>     | NS           |                  |                        |                |            |                        |
| rs2183408  | 9          | 4.00E-05     | 0.56         | <i>BNC2</i>     | NS           |                  |                        |                |            |                        |
| rs1537004  | 9          | 4.00E-05     | 0.56         | <i>BNC2</i>     | NS           |                  |                        |                |            |                        |
| rs12344777 | 9          | 4.00E-05     | 0.56         | <i>ZCCHC7</i>   | NS           |                  |                        |                |            |                        |
| rs1410069  | 10         | 4.00E-05     | 0.56         | <i>FAM107B</i>  | NS           |                  |                        |                |            |                        |
| rs2177834  | 10         | 4.00E-05     | 0.56         |                 | NS           |                  |                        |                |            |                        |
| rs11193006 | 10         | 4.00E-05     | 0.56         | <i>SORCS1</i>   | NS           |                  |                        |                |            |                        |
| rs10829831 | 10         | 4.00E-05     | 0.56         |                 | NS           |                  |                        |                |            |                        |
| rs11053748 | 12         | 4.00E-05     | 0.56         | <i>CD163L1</i>  | NS           |                  |                        |                |            |                        |
| rs7325091  | 13         | 4.00E-05     | 0.56         |                 | NS           |                  |                        |                |            |                        |
| rs4622381  | 13         | 4.00E-05     | 0.56         |                 | NS           |                  |                        |                |            |                        |
| rs767327   | 13         | 4.00E-05     | 0.56         |                 | NS           |                  |                        |                |            |                        |
| rs8016886  | 14         | 4.00E-05     | 0.56         | <i>NRXN3</i>    | NS           |                  |                        |                |            |                        |
| rs17764734 | 14         | 4.00E-05     | 0.56         | <i>NRXN3</i>    | NS           |                  |                        |                |            |                        |
| rs4784406  | 16         | 4.00E-05     | 0.56         |                 | NS           |                  |                        |                |            |                        |
| rs4812793  | 20         | 4.00E-05     | 0.56         | <i>JPH2</i>     | NS           |                  |                        |                |            |                        |
| rs5800     | 1          | 5.00E-05     | 0.56         | <i>EDN2</i>     | NS           |                  |                        |                |            |                        |
| rs360805   | 2          | 5.00E-05     | 0.56         |                 | NS           |                  |                        |                |            |                        |
| rs17013188 | 2          | 5.00E-05     | 0.56         |                 | NS           |                  |                        |                |            |                        |
| rs1593711  | 3          | 5.00E-05     | 0.56         |                 | NS           |                  |                        |                |            |                        |
| rs10517543 | 4          | 5.00E-05     | 0.56         | <i>FLJ20273</i> | NS           |                  |                        |                |            |                        |
| rs6850142  | 4          | 5.00E-05     | 0.56         | <i>CORIN</i>    | NS           |                  |                        |                |            |                        |
| rs7866028  | 9          | 5.00E-05     | 0.56         |                 | NS           |                  |                        |                |            |                        |

| SNP        | Chromosome | pQTL p-value | pQTL q-value | SNP host gene | eQTL p-value | eQTL TARGET GENE | Target gene chromosome | Target gene ID | Transcript | Expression-AUC p-value |
|------------|------------|--------------|--------------|---------------|--------------|------------------|------------------------|----------------|------------|------------------------|
| rs7866124  | 9          | 5.00E-05     | 0.56         | ZCCHC7        | NS           |                  |                        |                |            |                        |
| rs7043643  | 9          | 5.00E-05     | 0.56         | ZCCHC7        | NS           |                  |                        |                |            |                        |
| rs630804   | 9          | 5.00E-05     | 0.56         | ZCCHC7        | NS           |                  |                        |                |            |                        |
| rs489657   | 9          | 5.00E-05     | 0.56         | ZCCHC7        | NS           |                  |                        |                |            |                        |
| rs308497   | 9          | 5.00E-05     | 0.56         | ZCCHC7        | NS           |                  |                        |                |            |                        |
| rs641925   | 9          | 5.00E-05     | 0.56         | ZCCHC7        | NS           |                  |                        |                |            |                        |
| rs641935   | 9          | 5.00E-05     | 0.56         | ZCCHC7        | NS           |                  |                        |                |            |                        |
| rs2935713  | 10         | 5.00E-05     | 0.56         |               | NS           |                  |                        |                |            |                        |
| rs7124879  | 11         | 5.00E-05     | 0.56         | PARVA         | NS           |                  |                        |                |            |                        |
| rs10500992 | 11         | 5.00E-05     | 0.56         | LUZP2         | NS           |                  |                        |                |            |                        |
| rs17068258 | 18         | 5.00E-05     | 0.56         |               | NS           |                  |                        |                |            |                        |
| rs2238809  | 22         | 5.00E-05     | 0.56         | FBLN1         | NS           |                  |                        |                |            |                        |
| rs2238810  | 22         | 5.00E-05     | 0.56         | FBLN1         | NS           |                  |                        |                |            |                        |
| rs678253   | 1          | 6.00E-05     | 0.56         | SGIP1         | NS           |                  |                        |                |            |                        |
| rs17401980 | 1          | 6.00E-05     | 0.56         |               | NS           |                  |                        |                |            |                        |
| rs7685021  | 4          | 6.00E-05     | 0.56         |               | NS           |                  |                        |                |            |                        |
| rs7682566  | 4          | 6.00E-05     | 0.56         |               | NS           |                  |                        |                |            |                        |
| rs4386686  | 5          | 6.00E-05     | 0.56         |               | NS           |                  |                        |                |            |                        |
| rs4700416  | 5          | 6.00E-05     | 0.56         |               | NS           |                  |                        |                |            |                        |
| rs441126   | 6          | 6.00E-05     | 0.56         |               | NS           |                  |                        |                |            |                        |
| rs423209   | 6          | 6.00E-05     | 0.56         |               | NS           |                  |                        |                |            |                        |
| rs10274763 | 7          | 6.00E-05     | 0.56         |               | NS           |                  |                        |                |            |                        |
| rs2375027  | 7          | 6.00E-05     | 0.56         |               | NS           |                  |                        |                |            |                        |
| rs4377877  | 7          | 6.00E-05     | 0.56         |               | NS           |                  |                        |                |            |                        |
| rs1876235  | 8          | 6.00E-05     | 0.56         | XKR4          | NS           |                  |                        |                |            |                        |
| rs10283434 | 9          | 6.00E-05     | 0.56         | ZCCHC7        | NS           |                  |                        |                |            |                        |
| rs7894696  | 10         | 6.00E-05     | 0.56         |               | NS           |                  |                        |                |            |                        |
| rs12220921 | 10         | 6.00E-05     | 0.56         | SORCS1        | NS           |                  |                        |                |            |                        |
| rs7069395  | 10         | 6.00E-05     | 0.56         | SORCS1        | NS           |                  |                        |                |            |                        |
| rs593775   | 11         | 6.00E-05     | 0.56         |               | NS           |                  |                        |                |            |                        |
| rs7484554  | 12         | 6.00E-05     | 0.56         | CD163L1       | NS           |                  |                        |                |            |                        |
| rs7997402  | 13         | 6.00E-05     | 0.56         |               | NS           |                  |                        |                |            |                        |
| rs12583615 | 13         | 6.00E-05     | 0.56         |               | NS           |                  |                        |                |            |                        |
| rs7982125  | 13         | 6.00E-05     | 0.56         |               | NS           |                  |                        |                |            |                        |
| rs12100048 | 13         | 6.00E-05     | 0.56         |               | NS           |                  |                        |                |            |                        |
| rs6561575  | 13         | 6.00E-05     | 0.56         |               | NS           |                  |                        |                |            |                        |
| rs11073531 | 15         | 6.00E-05     | 0.56         |               | NS           |                  |                        |                |            |                        |
| rs6496217  | 15         | 6.00E-05     | 0.56         |               | NS           |                  |                        |                |            |                        |

| SNP        | Chromosome | pQTL p-value | pQTL q-value | SNP host gene    | eQTL p-value | eQTL TARGET GENE | Target gene chromosome | Target gene ID | Transcript | Expression-AUC p-value |
|------------|------------|--------------|--------------|------------------|--------------|------------------|------------------------|----------------|------------|------------------------|
| rs11907917 | 20         | 6.00E-05     | 0.56         | <i>C20orf133</i> | NS           |                  |                        |                |            |                        |
| rs1884665  | 20         | 6.00E-05     | 0.56         | <i>APCDD1L</i>   | NS           |                  |                        |                |            |                        |
| rs6765710  | 3          | 7.00E-05     | 0.56         |                  | NS           |                  |                        |                |            |                        |
| rs3936223  | 5          | 7.00E-05     | 0.56         |                  | NS           |                  |                        |                |            |                        |
| rs413887   | 6          | 7.00E-05     | 0.56         |                  | NS           |                  |                        |                |            |                        |
| rs419434   | 6          | 7.00E-05     | 0.56         |                  | NS           |                  |                        |                |            |                        |
| rs7749412  | 6          | 7.00E-05     | 0.56         |                  | NS           |                  |                        |                |            |                        |
| rs2009115  | 7          | 7.00E-05     | 0.56         | <i>JTV1</i>      | NS           |                  |                        |                |            |                        |
| rs11136521 | 8          | 7.00E-05     | 0.56         |                  | NS           |                  |                        |                |            |                        |
| rs2121900  | 8          | 7.00E-05     | 0.56         |                  | NS           |                  |                        |                |            |                        |
| rs702770   | 8          | 7.00E-05     | 0.56         |                  | NS           |                  |                        |                |            |                        |
| rs16934964 | 9          | 7.00E-05     | 0.56         | <i>BNC2</i>      | NS           |                  |                        |                |            |                        |
| rs12349090 | 9          | 7.00E-05     | 0.56         | <i>PIP5K1B</i>   | NS           |                  |                        |                |            |                        |
| rs10823615 | 10         | 7.00E-05     | 0.56         | <i>ADAMTS14</i>  | NS           |                  |                        |                |            |                        |
| rs11232307 | 11         | 7.00E-05     | 0.56         |                  | NS           |                  |                        |                |            |                        |
| rs2248995  | 12         | 7.00E-05     | 0.56         |                  | NS           |                  |                        |                |            |                        |
| rs2700507  | 12         | 7.00E-05     | 0.56         | <i>KRTHB5</i>    | NS           |                  |                        |                |            |                        |
| rs784080   | 12         | 7.00E-05     | 0.56         | <i>KRTHB5</i>    | NS           |                  |                        |                |            |                        |
| rs2722194  | 12         | 7.00E-05     | 0.56         |                  | NS           |                  |                        |                |            |                        |
| rs11159413 | 14         | 7.00E-05     | 0.56         | <i>NRXN3</i>     | NS           |                  |                        |                |            |                        |
| rs3730994  | 19         | 7.00E-05     | 0.56         | <i>LIG1</i>      | NS           |                  |                        |                |            |                        |
| rs4853273  | 2          | 8.00E-05     | 0.56         |                  | NS           |                  |                        |                |            |                        |
| rs7630699  | 3          | 8.00E-05     | 0.56         |                  | NS           |                  |                        |                |            |                        |
| rs17500497 | 5          | 8.00E-05     | 0.56         |                  | NS           |                  |                        |                |            |                        |
| rs10057706 | 5          | 8.00E-05     | 0.56         |                  | NS           |                  |                        |                |            |                        |
| rs9454556  | 6          | 8.00E-05     | 0.56         |                  | NS           |                  |                        |                |            |                        |
| rs7830389  | 8          | 8.00E-05     | 0.56         |                  | NS           |                  |                        |                |            |                        |
| rs12676937 | 8          | 8.00E-05     | 0.56         |                  | NS           |                  |                        |                |            |                        |
| rs12678734 | 8          | 8.00E-05     | 0.56         |                  | NS           |                  |                        |                |            |                        |
| rs167429   | 9          | 8.00E-05     | 0.56         | <i>ZCCHC7</i>    | NS           |                  |                        |                |            |                        |
| rs7907123  | 10         | 8.00E-05     | 0.56         |                  | NS           |                  |                        |                |            |                        |
| rs12285843 | 11         | 8.00E-05     | 0.56         | <i>ZNF214</i>    | NS           |                  |                        |                |            |                        |
| rs596049   | 11         | 8.00E-05     | 0.56         |                  | NS           |                  |                        |                |            |                        |
| rs11061845 | 12         | 8.00E-05     | 0.56         |                  | NS           |                  |                        |                |            |                        |
| rs10431296 | 12         | 8.00E-05     | 0.56         | <i>CD163L1</i>   | NS           |                  |                        |                |            |                        |
| rs10148391 | 14         | 8.00E-05     | 0.56         | <i>RAD51L1</i>   | NS           |                  |                        |                |            |                        |
| rs4776110  | 15         | 8.00E-05     | 0.56         |                  | NS           |                  |                        |                |            |                        |
| rs5767367  | 22         | 8.00E-05     | 0.56         | <i>TBC1D22A</i>  | NS           |                  |                        |                |            |                        |

| SNP        | Chromosome | pQTL p-value | pQTL q-value | SNP host gene   | eQTL p-value | eQTL TARGET GENE | Target gene chromosome | Target gene ID | Transcript | Expression-AUC p-value |
|------------|------------|--------------|--------------|-----------------|--------------|------------------|------------------------|----------------|------------|------------------------|
| rs28957420 | 2          | 9.00E-05     | 0.56         |                 | NS           |                  |                        |                |            |                        |
| rs7580522  | 2          | 9.00E-05     | 0.56         |                 | NS           |                  |                        |                |            |                        |
| rs7717685  | 5          | 9.00E-05     | 0.56         |                 | NS           |                  |                        |                |            |                        |
| rs245184   | 5          | 9.00E-05     | 0.56         |                 | NS           |                  |                        |                |            |                        |
| rs2089997  | 6          | 9.00E-05     | 0.56         |                 | NS           |                  |                        |                |            |                        |
| rs2089998  | 6          | 9.00E-05     | 0.56         |                 | NS           |                  |                        |                |            |                        |
| rs12670214 | 7          | 9.00E-05     | 0.56         |                 | NS           |                  |                        |                |            |                        |
| rs17704516 | 7          | 9.00E-05     | 0.56         | <i>PDK4</i>     | NS           |                  |                        |                |            |                        |
| rs1685124  | 7          | 9.00E-05     | 0.56         | <i>TMEM130</i>  | NS           |                  |                        |                |            |                        |
| rs17075013 | 8          | 9.00E-05     | 0.56         |                 | NS           |                  |                        |                |            |                        |
| rs10810597 | 9          | 9.00E-05     | 0.56         | <i>BNC2</i>     | NS           |                  |                        |                |            |                        |
| rs12342490 | 9          | 9.00E-05     | 0.56         | <i>PIP5K1B</i>  | NS           |                  |                        |                |            |                        |
| rs17221818 | 10         | 9.00E-05     | 0.56         | <i>ADARB2</i>   | NS           |                  |                        |                |            |                        |
| rs16913464 | 11         | 9.00E-05     | 0.56         | <i>LUZP2</i>    | NS           |                  |                        |                |            |                        |
| rs9567733  | 13         | 9.00E-05     | 0.56         |                 | NS           |                  |                        |                |            |                        |
| rs10483934 | 14         | 9.00E-05     | 0.56         | <i>NRXN3</i>    | NS           |                  |                        |                |            |                        |
| rs2430338  | 14         | 9.00E-05     | 0.56         |                 | NS           |                  |                        |                |            |                        |
| rs295090   | 17         | 9.00E-05     | 0.56         |                 | NS           |                  |                        |                |            |                        |
| rs9908914  | 17         | 9.00E-05     | 0.56         | <i>CA10</i>     | NS           |                  |                        |                |            |                        |
| rs3731014  | 19         | 9.00E-05     | 0.56         | <i>LIG1</i>     | NS           |                  |                        |                |            |                        |
| rs2206909  | 20         | 9.00E-05     | 0.56         |                 | NS           |                  |                        |                |            |                        |
| rs211912   | 20         | 9.00E-05     | 0.56         |                 | NS           |                  |                        |                |            |                        |
| rs12029405 | 1          | 1.00E-04     | 0.56         |                 | NS           |                  |                        |                |            |                        |
| rs10890137 | 1          | 1.00E-04     | 0.56         | <i>C1orf173</i> | NS           |                  |                        |                |            |                        |
| rs1340987  | 1          | 1.00E-04     | 0.56         | <i>C1orf173</i> | NS           |                  |                        |                |            |                        |
| rs7355015  | 1          | 1.00E-04     | 0.56         |                 | NS           |                  |                        |                |            |                        |
| rs6604053  | 1          | 1.00E-04     | 0.56         | <i>TGFBR3</i>   | NS           |                  |                        |                |            |                        |
| rs7525027  | 1          | 1.00E-04     | 0.56         | <i>TSPAN2</i>   | NS           |                  |                        |                |            |                        |
| rs10923157 | 1          | 1.00E-04     | 0.56         |                 | NS           |                  |                        |                |            |                        |
| rs6672583  | 1          | 1.00E-04     | 0.56         |                 | NS           |                  |                        |                |            |                        |
| rs17047040 | 1          | 1.00E-04     | 0.56         |                 | NS           |                  |                        |                |            |                        |
| rs17047046 | 1          | 1.00E-04     | 0.56         |                 | NS           |                  |                        |                |            |                        |
| rs7520613  | 1          | 1.00E-04     | 0.56         |                 | NS           |                  |                        |                |            |                        |
| rs7542702  | 1          | 1.00E-04     | 0.56         |                 | NS           |                  |                        |                |            |                        |
| rs6604570  | 1          | 1.00E-04     | 0.56         |                 | NS           |                  |                        |                |            |                        |
| rs17047068 | 1          | 1.00E-04     | 0.56         |                 | NS           |                  |                        |                |            |                        |
| rs17047070 | 1          | 1.00E-04     | 0.56         |                 | NS           |                  |                        |                |            |                        |
| rs17047074 | 1          | 1.00E-04     | 0.56         |                 | NS           |                  |                        |                |            |                        |



| SNP        | Chromosome | pQTL p-value | pQTL q-value | SNP host gene    | eQTL p-value | eQTL TARGET GENE | Target gene chromosome | Target gene ID | Transcript | Expression-AUC p-value |
|------------|------------|--------------|--------------|------------------|--------------|------------------|------------------------|----------------|------------|------------------------|
| rs10915816 | 1          | 1.00E-04     | 0.56         | <i>LOC127602</i> | NS           |                  |                        |                |            |                        |
| rs3014572  | 1          | 1.00E-04     | 0.56         | <i>KMO</i>       | NS           |                  |                        |                |            |                        |
| rs12617390 | 2          | 1.00E-04     | 0.56         |                  | NS           |                  |                        |                |            |                        |
| rs1872790  | 2          | 1.00E-04     | 0.56         |                  | NS           |                  |                        |                |            |                        |
| rs13412373 | 2          | 1.00E-04     | 0.56         |                  | NS           |                  |                        |                |            |                        |
| rs6736357  | 2          | 1.00E-04     | 0.56         |                  | NS           |                  |                        |                |            |                        |
| rs6751270  | 2          | 1.00E-04     | 0.56         |                  | NS           |                  |                        |                |            |                        |
| rs2878560  | 2          | 1.00E-04     | 0.56         | <i>PARD3B</i>    | NS           |                  |                        |                |            |                        |
| rs11675561 | 2          | 1.00E-04     | 0.56         | <i>SPAG16</i>    | NS           |                  |                        |                |            |                        |
| rs7577145  | 2          | 1.00E-04     | 0.56         |                  | NS           |                  |                        |                |            |                        |
| rs16850570 | 2          | 1.00E-04     | 0.56         |                  | NS           |                  |                        |                |            |                        |
| rs958629   | 3          | 1.00E-04     | 0.56         |                  | NS           |                  |                        |                |            |                        |
| rs12629679 | 3          | 1.00E-04     | 0.56         | <i>FLJ16641</i>  | NS           |                  |                        |                |            |                        |
| rs10804929 | 3          | 1.00E-04     | 0.56         |                  | NS           |                  |                        |                |            |                        |
| rs4861344  | 4          | 1.00E-04     | 0.56         | <i>APBB2</i>     | NS           |                  |                        |                |            |                        |
| rs2048176  | 4          | 1.00E-04     | 0.56         | <i>APBB2</i>     | NS           |                  |                        |                |            |                        |
| rs7676332  | 4          | 1.00E-04     | 0.56         |                  | NS           |                  |                        |                |            |                        |
| rs6850358  | 4          | 1.00E-04     | 0.56         |                  | NS           |                  |                        |                |            |                        |
| rs17293590 | 4          | 1.00E-04     | 0.56         |                  | NS           |                  |                        |                |            |                        |
| rs12501395 | 4          | 1.00E-04     | 0.56         |                  | NS           |                  |                        |                |            |                        |
| rs6858178  | 4          | 1.00E-04     | 0.56         |                  | NS           |                  |                        |                |            |                        |
| rs13113348 | 4          | 1.00E-04     | 0.56         |                  | NS           |                  |                        |                |            |                        |
| rs6553212  | 4          | 1.00E-04     | 0.56         |                  | NS           |                  |                        |                |            |                        |
| rs6836757  | 4          | 1.00E-04     | 0.56         |                  | NS           |                  |                        |                |            |                        |
| rs10057109 | 5          | 1.00E-04     | 0.56         |                  | NS           |                  |                        |                |            |                        |
| rs6865426  | 5          | 1.00E-04     | 0.56         |                  | NS           |                  |                        |                |            |                        |
| rs2943011  | 5          | 1.00E-04     | 0.56         |                  | NS           |                  |                        |                |            |                        |
| rs2916620  | 5          | 1.00E-04     | 0.56         |                  | NS           |                  |                        |                |            |                        |
| rs13162088 | 5          | 1.00E-04     | 0.56         |                  | NS           |                  |                        |                |            |                        |
| rs10071045 | 5          | 1.00E-04     | 0.56         |                  | NS           |                  |                        |                |            |                        |
| rs12194492 | 6          | 1.00E-04     | 0.56         | <i>GMDS</i>      | NS           |                  |                        |                |            |                        |
| rs1196388  | 6          | 1.00E-04     | 0.56         | <i>GMDS</i>      | NS           |                  |                        |                |            |                        |
| rs11242754 | 6          | 1.00E-04     | 0.56         |                  | NS           |                  |                        |                |            |                        |
| rs6455280  | 6          | 1.00E-04     | 0.56         |                  | NS           |                  |                        |                |            |                        |
| rs9454536  | 6          | 1.00E-04     | 0.56         |                  | NS           |                  |                        |                |            |                        |
| rs9454539  | 6          | 1.00E-04     | 0.56         |                  | NS           |                  |                        |                |            |                        |
| rs6936115  | 6          | 1.00E-04     | 0.56         |                  | NS           |                  |                        |                |            |                        |
| rs6455284  | 6          | 1.00E-04     | 0.56         |                  | NS           |                  |                        |                |            |                        |

| SNP        | Chromosome | pQTL p-value | pQTL q-value | SNP host gene   | eQTL p-value | eQTL TARGET GENE | Target gene chromosome | Target gene ID | Transcript | Expression-AUC p-value |
|------------|------------|--------------|--------------|-----------------|--------------|------------------|------------------------|----------------|------------|------------------------|
| rs9446033  | 6          | 1.00E-04     | 0.56         |                 | NS           |                  |                        |                |            |                        |
| rs9363946  | 6          | 1.00E-04     | 0.56         |                 | NS           |                  |                        |                |            |                        |
| rs9454563  | 6          | 1.00E-04     | 0.56         |                 | NS           |                  |                        |                |            |                        |
| rs7774085  | 6          | 1.00E-04     | 0.56         |                 | NS           |                  |                        |                |            |                        |
| rs7356811  | 6          | 1.00E-04     | 0.56         |                 | NS           |                  |                        |                |            |                        |
| rs9354779  | 6          | 1.00E-04     | 0.56         |                 | NS           |                  |                        |                |            |                        |
| rs7746897  | 6          | 1.00E-04     | 0.56         |                 | NS           |                  |                        |                |            |                        |
| rs12214250 | 6          | 1.00E-04     | 0.56         |                 | NS           |                  |                        |                |            |                        |
| rs10485198 | 6          | 1.00E-04     | 0.56         | <i>ARID1B</i>   | NS           |                  |                        |                |            |                        |
| rs4265101  | 7          | 1.00E-04     | 0.56         | <i>KIAA1856</i> | NS           |                  |                        |                |            |                        |
| rs10238561 | 7          | 1.00E-04     | 0.56         |                 | NS           |                  |                        |                |            |                        |
| rs729720   | 7          | 1.00E-04     | 0.56         | <i>DOCK4</i>    | NS           |                  |                        |                |            |                        |
| rs10464649 | 7          | 1.00E-04     | 0.56         |                 | NS           |                  |                        |                |            |                        |
| rs12706089 | 7          | 1.00E-04     | 0.56         |                 | NS           |                  |                        |                |            |                        |
| rs4727831  | 7          | 1.00E-04     | 0.56         |                 | NS           |                  |                        |                |            |                        |
| rs9648679  | 7          | 1.00E-04     | 0.56         |                 | NS           |                  |                        |                |            |                        |
| rs1014957  | 7          | 1.00E-04     | 0.56         |                 | NS           |                  |                        |                |            |                        |
| rs12679403 | 8          | 1.00E-04     | 0.56         |                 | NS           |                  |                        |                |            |                        |
| rs6992867  | 8          | 1.00E-04     | 0.56         |                 | NS           |                  |                        |                |            |                        |
| rs2840460  | 8          | 1.00E-04     | 0.56         |                 | NS           |                  |                        |                |            |                        |
| rs6981486  | 8          | 1.00E-04     | 0.56         |                 | NS           |                  |                        |                |            |                        |
| rs12678753 | 8          | 1.00E-04     | 0.56         |                 | NS           |                  |                        |                |            |                        |
| rs10118925 | 9          | 1.00E-04     | 0.56         | <i>AK3</i>      | NS           |                  |                        |                |            |                        |
| rs7469938  | 9          | 1.00E-04     | 0.56         |                 | NS           |                  |                        |                |            |                        |
| rs608332   | 9          | 1.00E-04     | 0.56         | <i>ZCCHC7</i>   | NS           |                  |                        |                |            |                        |
| rs172623   | 9          | 1.00E-04     | 0.56         |                 | NS           |                  |                        |                |            |                        |
| rs557142   | 9          | 1.00E-04     | 0.56         |                 | NS           |                  |                        |                |            |                        |
| rs4478645  | 9          | 1.00E-04     | 0.56         |                 | NS           |                  |                        |                |            |                        |
| rs11138911 | 9          | 1.00E-04     | 0.56         |                 | NS           |                  |                        |                |            |                        |
| rs11138912 | 9          | 1.00E-04     | 0.56         |                 | NS           |                  |                        |                |            |                        |
| rs10867646 | 9          | 1.00E-04     | 0.56         |                 | NS           |                  |                        |                |            |                        |
| rs1332868  | 9          | 1.00E-04     | 0.56         |                 | NS           |                  |                        |                |            |                        |
| rs1332867  | 9          | 1.00E-04     | 0.56         |                 | NS           |                  |                        |                |            |                        |
| rs11142109 | 9          | 1.00E-04     | 0.56         |                 | NS           |                  |                        |                |            |                        |
| rs7021512  | 9          | 1.00E-04     | 0.56         |                 | NS           |                  |                        |                |            |                        |
| rs7032099  | 9          | 1.00E-04     | 0.56         |                 | NS           |                  |                        |                |            |                        |
| rs2692724  | 10         | 1.00E-04     | 0.56         |                 | NS           |                  |                        |                |            |                        |
| rs2578121  | 10         | 1.00E-04     | 0.56         |                 | NS           |                  |                        |                |            |                        |

| SNP        | Chromosome | pQTL p-value | pQTL q-value | SNP host gene    | eQTL p-value | eQTL TARGET GENE | Target gene chromosome | Target gene ID | Transcript | Expression-AUC p-value |
|------------|------------|--------------|--------------|------------------|--------------|------------------|------------------------|----------------|------------|------------------------|
| rs1435961  | 10         | 1.00E-04     | 0.56         |                  | NS           |                  |                        |                |            |                        |
| rs7083544  | 10         | 1.00E-04     | 0.56         |                  | NS           |                  |                        |                |            |                        |
| rs2570539  | 10         | 1.00E-04     | 0.56         |                  | NS           |                  |                        |                |            |                        |
| rs881009   | 10         | 1.00E-04     | 0.56         |                  | NS           |                  |                        |                |            |                        |
| rs7085383  | 10         | 1.00E-04     | 0.56         | <i>SORCS1</i>    | NS           |                  |                        |                |            |                        |
| rs1883101  | 11         | 1.00E-04     | 0.56         | <i>SCUBE2</i>    | NS           |                  |                        |                |            |                        |
| rs16936075 | 11         | 1.00E-04     | 0.56         |                  | NS           |                  |                        |                |            |                        |
| rs2509713  | 11         | 1.00E-04     | 0.56         | <i>ACY3</i>      | NS           |                  |                        |                |            |                        |
| rs477688   | 11         | 1.00E-04     | 0.56         |                  | NS           |                  |                        |                |            |                        |
| rs506489   | 11         | 1.00E-04     | 0.56         |                  | NS           |                  |                        |                |            |                        |
| rs556860   | 11         | 1.00E-04     | 0.56         |                  | NS           |                  |                        |                |            |                        |
| rs1216683  | 11         | 1.00E-04     | 0.56         |                  | NS           |                  |                        |                |            |                        |
| rs7489197  | 12         | 1.00E-04     | 0.56         |                  | NS           |                  |                        |                |            |                        |
| rs11183145 | 12         | 1.00E-04     | 0.56         |                  | NS           |                  |                        |                |            |                        |
| rs9567254  | 13         | 1.00E-04     | 0.56         |                  | NS           |                  |                        |                |            |                        |
| rs12584069 | 13         | 1.00E-04     | 0.56         |                  | NS           |                  |                        |                |            |                        |
| rs9600126  | 13         | 1.00E-04     | 0.56         |                  | NS           |                  |                        |                |            |                        |
| rs2793741  | 13         | 1.00E-04     | 0.56         | <i>CLYBL</i>     | NS           |                  |                        |                |            |                        |
| rs1242715  | 14         | 1.00E-04     | 0.56         |                  | NS           |                  |                        |                |            |                        |
| rs4900717  | 14         | 1.00E-04     | 0.56         |                  | NS           |                  |                        |                |            |                        |
| rs4898563  | 14         | 1.00E-04     | 0.56         |                  | NS           |                  |                        |                |            |                        |
| rs4898569  | 14         | 1.00E-04     | 0.56         |                  | NS           |                  |                        |                |            |                        |
| rs2859928  | 14         | 1.00E-04     | 0.56         |                  | NS           |                  |                        |                |            |                        |
| rs12593677 | 15         | 1.00E-04     | 0.56         | <i>SLCO3A1</i>   | NS           |                  |                        |                |            |                        |
| rs8033820  | 15         | 1.00E-04     | 0.56         | <i>C15orf32</i>  | NS           |                  |                        |                |            |                        |
| rs2124648  | 15         | 1.00E-04     | 0.56         |                  | NS           |                  |                        |                |            |                        |
| rs12102551 | 16         | 1.00E-04     | 0.56         |                  | NS           |                  |                        |                |            |                        |
| rs7198686  | 16         | 1.00E-04     | 0.56         | <i>NKD1</i>      | NS           |                  |                        |                |            |                        |
| rs749985   | 16         | 1.00E-04     | 0.56         |                  | NS           |                  |                        |                |            |                        |
| rs931455   | 16         | 1.00E-04     | 0.56         |                  | NS           |                  |                        |                |            |                        |
| rs3829554  | 16         | 1.00E-04     | 0.56         | <i>USP10</i>     | NS           |                  |                        |                |            |                        |
| rs503716   | 18         | 1.00E-04     | 0.56         |                  | NS           |                  |                        |                |            |                        |
| rs10417555 | 19         | 1.00E-04     | 0.56         |                  | NS           |                  |                        |                |            |                        |
| rs200780   | 20         | 1.00E-04     | 0.56         | <i>C20orf133</i> | NS           |                  |                        |                |            |                        |
| rs11908037 | 20         | 1.00E-04     | 0.56         | <i>ACSS1</i>     | NS           |                  |                        |                |            |                        |
| rs6141302  | 20         | 1.00E-04     | 0.56         | <i>ASXL1</i>     | NS           |                  |                        |                |            |                        |
| rs2427020  | 20         | 1.00E-04     | 0.56         | <i>CDH4</i>      | NS           |                  |                        |                |            |                        |
| rs229122   | 21         | 1.00E-04     | 0.56         |                  | NS           |                  |                        |                |            |                        |

| <b>SNP</b> | <b>Chromosome</b> | <b>pQTL<br/>p-value</b> | <b>pQTL<br/>q-<br/>value</b> | <b>SNP host gene</b> | <b>eQTL<br/>p-value</b> | <b>eQTL<br/>TARGET<br/>GENE</b> | <b>Target gene<br/>chromosome</b> | <b>Target<br/>gene ID</b> | <b>Transcript</b> | <b>Expression-<br/>AUC p-value</b> |
|------------|-------------------|-------------------------|------------------------------|----------------------|-------------------------|---------------------------------|-----------------------------------|---------------------------|-------------------|------------------------------------|
| rs8142203  | 22                | 1.00E-04                | 0.56                         |                      | NS                      |                                 |                                   |                           |                   |                                    |
| rs11090892 | 22                | 1.00E-04                | 0.56                         | <i>TBC1D22A</i>      | NS                      |                                 |                                   |                           |                   |                                    |
